# Supplementary material for: Receptor-like cytoplasmic kinases of different subfamilies differentially regulate SOBIR1/BAK1-mediated immune responses in Nicotiana benthamiana
Source: PubMed Central journal article supplement (PMC11109355; doi:10.1038/s41467-024-48313-1), 2024-05-21
Supplement: 41467_2024_48313_MOESM1_ESM.pdf [file 41467_2024_48313_MOESM1_ESM.pdf]

## Supplemental information

### SOBIR1 homologs

|                                                                    |                                      |                  |                  |                  |                  |                  |                                 |
|--------------------------------------------------------------------|--------------------------------------|------------------|------------------|------------------|------------------|------------------|---------------------------------|
| Nicotiana benthamiana_Niben101Scf03816g01001.1 ( <i>NbSOBIR1</i> ) | DFGLAKA --L---PDAH-----              | ↓ <sup>S12</sup> | ↓ <sup>S15</sup> | ↓ <sup>S16</sup> | ↓ <sup>S17</sup> | ↓ <sup>S22</sup> | THVTTSNVAGTVGYIAPE              |
| Solanum lycopersicum_Solyc06g071810.1 ( <i>S/SOBIR1</i> )          | DFGLAKA --V---PDAH-----              |                  |                  |                  |                  |                  | THITTSNVAGTVGFI APE             |
| Solanum lycopersicum_Solyc03g111800.2 ( <i>S/SOBIR1-like</i> )     | DFGLAKA --V---PDAH-----              |                  |                  |                  |                  |                  | THITTSNVAGTIGYIAPE              |
| Arabidopsis thaliana_AT2G31880 ( <i>AtSOBIR1</i> )                 | DFGLAKA --M---PDAV-----              |                  |                  |                  |                  |                  | THITTSNVAGTVGYIAPE              |
| Nicotiana tabacum_A0A1S3XP18                                       | DFGLAKA --L---PDAH-----              |                  |                  |                  |                  |                  | THITTSNVAGTVGYIAPE              |
| Nicotiana sylvestris_A0A1U7WH59                                    | DFGLAKA --L---PDAH-----              |                  |                  |                  |                  |                  | THITTSNVAGTVGYIAPE              |
| Nicotiana attenuata_A0A1J6INR1                                     | DFGLAKA --L---PDAH-----              |                  |                  |                  |                  |                  | THITTSNVAGTVGYIAPE              |
| Nicotiana tabacum_A0A1S3ZD83                                       | DFGLAKA --V---PDAH-----              |                  |                  |                  |                  |                  | THVTTSNVAGTVGYIAPE              |
| Solanum tuberosum_M1CKT4                                           | DFGLAKA --V---PDAH-----              |                  |                  |                  |                  |                  | THITTSNVAGTMGYIAPE              |
| Capsicum chinense_A0A2G3BFP7                                       | DFGLAKA --V---PDAH-----              |                  |                  |                  |                  |                  | THVTTSNVAGTVGYIAPE              |
| Capsicum baccatum_A0A2G2WM84                                       | DFGLAKA --V---PDAH-----              |                  |                  |                  |                  |                  | THVTTSNVAGTVGYIAPE              |
| Capsicum annuum_A0A2G2Y0L5                                         | DFGLAKA --V---PDAH-----              |                  |                  |                  |                  |                  | THVTTSNVAGTVGYIAPE              |
| Solanum tuberosum_M1B7X0                                           | DFGLAKA --V---PDAH-----              |                  |                  |                  |                  |                  | THITTSNVAGTIGYIAPE              |
| Capsicum chinense_A0A2G3CCQ8                                       | DFGLAKA --V---PDAH-----              |                  |                  |                  |                  |                  | THITTSNVAGTIGYIAPE              |
| Capsicum annuum_A0A1U8G6T0                                         | DFGLAKA --V---PDAH-----              |                  |                  |                  |                  |                  | THITTSNVAGTIGYIAPE              |
| Capsicum baccatum_A0A2G2X8C5                                       | DFGLAKA --V---PDAH-----              |                  |                  |                  |                  |                  | THITTSNVAGTIGYIAPE              |
| Nicotiana attenuata_A0A314KS23                                     | DFGLAKA --I---PE <sup>S</sup> L----- |                  |                  |                  |                  |                  | THVSTSHVVGTLGYIAPA              |
| Coffea arabica_A0A6P6X9H5                                          | DFGLAKA --M---PEAY-----              |                  |                  |                  |                  |                  | THVTTSSNVVGT LGYIAPE            |
| Coffea arabica_A0A6P6X153                                          | DFGLAKA --M---PEAY-----              |                  |                  |                  |                  |                  | THVTTSSNVVGT LGYIAPE            |
| Coffea canephora_A0A068V365                                        | DFGLAKA --M---PEAY-----              |                  |                  |                  |                  |                  | THVTTSSNVVGT LGYIAPE            |
| Sesamum indicum_A0A6I9SRZ7                                         | DFGLAKA --M---PDAN-----              |                  |                  |                  |                  |                  | THVTTSNVAGTVGYIAPE              |
| Olea europaea subsp. europaea_A0A8S0R730                           | DFGLAKA --V---PEAN-----              |                  |                  |                  |                  |                  | THVSTSNVAGTAGYIAPE              |
| Camellia sinensis var. sinensis_A0A4S4DBV0                         | DFGLAKA --V---PDAH-----              |                  |                  |                  |                  |                  | THVTTSNVAGTVGYIAPE              |
| Rhododendron simsii_A0A834L953                                     | DFGLAKA --V---PDQD-----              |                  |                  |                  |                  |                  | THVTTSNVAGT LGYIAPE             |
| Vitis vinifera_F6GTQ3                                              | DFGLAKA --V---PDAN-----              |                  |                  |                  |                  |                  | THVTTSNVAGTVGYIAPE              |
| Tetradactylon sinense_A0A834Y9S3                                   | DFGLAKA --V---PDAN-----              |                  |                  |                  |                  |                  | THVTTSNVAGTVGYI <sup>S</sup> PE |
| Carpinus fangiana_A0A660KKL0                                       | DFGLAKA --M---PDAH-----              |                  |                  |                  |                  |                  | THISTSNVAGTVGYIAPE              |
| Prunus persica_M5WTY7                                              | DFGLAKA --V---PEYH-----              |                  |                  |                  |                  |                  | THITTSNVAGTVGYIAPE              |
| Quercus lobata_A0A7N2MNZ2                                          | DFGLAKA --M---PDAN-----              |                  |                  |                  |                  |                  | THITTSNVAGTVGYI <sup>S</sup> PE |
| Tetradactylon sinense_A0A834YD49                                   | DFGLAKA --V---PDAN-----              |                  |                  |                  |                  |                  | THVTTSNVAGTVGYI <sup>S</sup> PE |
| Handroanthus impetiginosus_A0A2G9HZY5                              | DFGLAKA --V---PDAN-----              |                  |                  |                  |                  |                  | THVTTSNVAGTVGYIAPE              |
| Prunus armeniaca_A0A6J5XG14                                        | DFGLAKA --V---PEYH-----              |                  |                  |                  |                  |                  | THITTSNVAGTVGYIAPE              |
| Actinidia chinensis var. chinensis_A0A2R6PUF8                      | DFGLAKA --V---PDAY-----              |                  |                  |                  |                  |                  | THVTTSNVAGTVGYIAPE              |
| Castanea mollissima_A0A8J4REW1                                     | DFGLAKA --M---PDAH-----              |                  |                  |                  |                  |                  | THITTSNVAGTVGYI <sup>S</sup> PE |
| Handroanthus impetiginosus_A0A2G9IBC5                              | DFGLAKA --V---PDAN-----              |                  |                  |                  |                  |                  | THVTTSNVAGTVGYIAPE              |
| Quercus lobata_A0A7N2MML4                                          | DFGLAKA --M---PDAN-----              |                  |                  |                  |                  |                  | THISTSNVAGTVGYI <sup>S</sup> PE |
| Jatropha curcas_A0A067KGN0                                         | DFGLAKA --M---PDAQ-----              |                  |                  |                  |                  |                  | THVSTSNVAGTVGYIAPE              |

### Other RLKs

|                                                                  |                                            |                      |
|------------------------------------------------------------------|--------------------------------------------|----------------------|
| Nicotiana benthamiana_Niben101Scf02128g00022.1 ( <i>NbBAK1</i> ) | DFGLAKL --M---DYKD-----                    | THVTTA -VRGT IGHIAPE |
| Solanum lycopersicum_Solyc10g047140.2 ( <i>S/BAK1</i> )          | DFGLAKL --M---DYKD-----                    | THVTTA -VRGT IGHIAPE |
| Arabidopsis thaliana_AT4G33430 ( <i>AtBAK1</i> )                 | DFGLAKL --M---DYKD-----                    | THVTTA -VRGT IGHIAPE |
| Arabidopsis thaliana_AT3G21630 ( <i>AtCERK1</i> )                | DFGLTKL --T---EVGG-----                    | SATRGAMGTFGYMAPE     |
| Arabidopsis thaliana_AT5G16000 ( <i>AtNIK1</i> )                 | DFGLAKL --L---DHQD-----                    | SHVTTA -VRGT VGHIAPE |
| Arabidopsis thaliana_AT4G39400 ( <i>AtBRI1</i> )                 | DFGMARL --M---SAMD-----                    | THLSVSTLAGTPGYVPE    |
| Arabidopsis thaliana_AT4G28490 ( <i>AtHAESA</i> )                | DFGIAKVGQM---SGSK-----                     | TPEAMSGIAGSGYIAPE    |
| Arabidopsis thaliana_AT5G20480 ( <i>AtEFR</i> )                  | DFGLAQL --L---YKYDRESFLNQFSSAGVVRGTIGYAAPE |                      |
| Arabidopsis thaliana_AT5G46330 ( <i>AtFLS2</i> )                 | DFGTARI --LGFREDGSS-----                   | TTASTSAFEGTIGYLAPE   |

**Supplementary Figure 1. Five potential phosphorylation sites in the activation segment of *NbSOBIR1* are highly conserved in the kinase domain of various RLKs from different plant species.** Protein sequences of the SOBIR1 homologs from various plant species were obtained from the UniProt database (<https://www.uniprot.org/>), while the protein sequences of other RLKs were retrieved from TAIR (<https://www.arabidopsis.org/index.jsp>) and the Sol Genomics Network (<https://solgenomics.net/>). The alignment was visualized using JalView and only the amino acid sequences of the activation segment of the kinase domain are shown. All the putatively phosphorylatable Ser (S) and Thr (T) residues are highlighted in orange. The positions of the five Ser/Thr residues of *NbSOBIR1* that are subjected to this study are indicated on top.

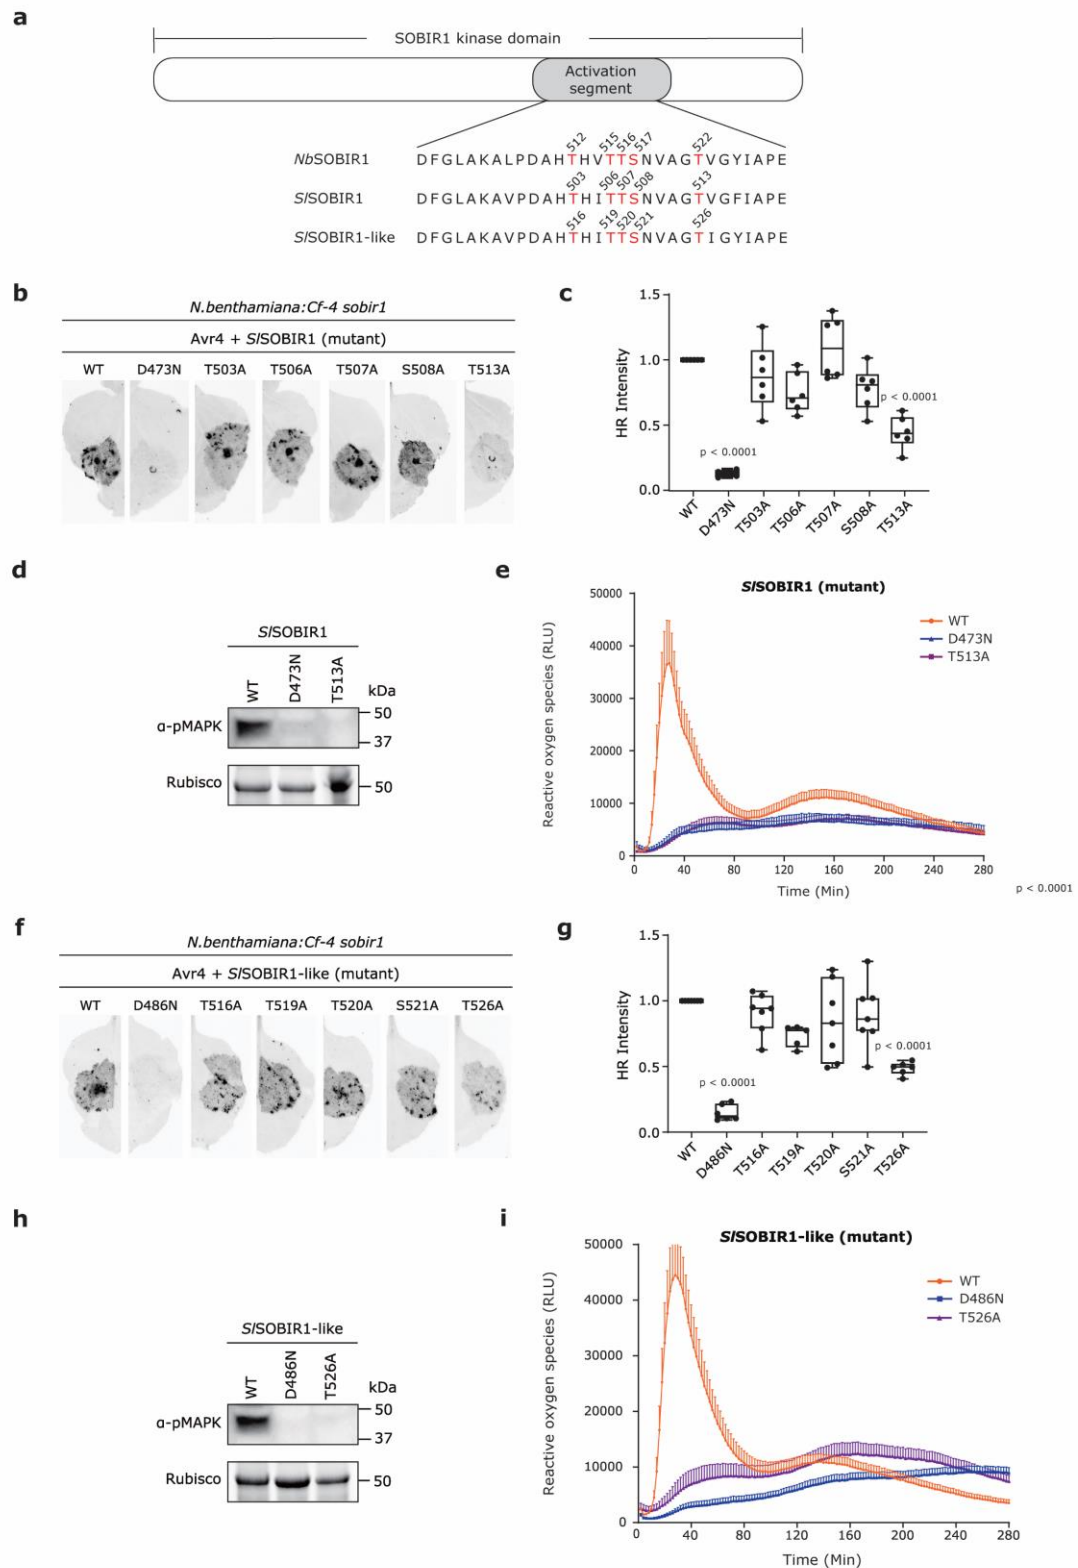

**Supplementary Figure 2. The analogous residues of *NbSOBIR1* Thr522 in both tomato *SOBIR1* and *SOBIR1*-like play a crucial role in mounting *Avr4*/*Cf-4*-triggered immune responses.** **a**, Schematic diagram of the kinase domain of *SOBIR1*, with the activation segment indicated. The amino acid sequences of the activation segments of *NbSOBIR1*, *S/SOBIR1* and

*S/SOBIR1*-like are aligned and are shown below the diagram. Conserved residues acting as potential phosphorylation sites are indicated in red. **b-e**, Mutagenesis screen of five potential phosphorylation sites in the activation segment of *S/SOBIR1* based on the *Avr4/Cf-4*-triggered HR activation (**b** and **c**), MAPK activation (**d**), and ROS burst (**e**). **f-i**, Mutagenesis screen of five potential phosphorylation sites in the activation segment of *S/SOBIR1*-like based on the *Avr4/Cf-4*-triggered HR activation (**f** and **g**), MAPK activation (**h**), and ROS burst (**i**). The development of an HR was imaged at 5 dpi by the Chemidoc (**b** and **f**), and the HR intensity was quantified by Image Lab (**c** and **g**). The HR intensity of leaves that transiently co-express *S/SOBIR1 WT* with *Avr4* (**c**) or *S/SOBIR1-like WT* with *Avr4* (**g**) was set as 1. Statistical analysis was performed with an ANOVA/Dunnett's multiple comparison test, compared with their corresponding WT. Dots indicate individual values (centre line, median; error bar, minima and maxima; n=6). **e, i**, Leaf discs of *N. benthamiana:Cf-4 sobir1* knock-out plants that transiently express individual *S/SOBIR1* and *S/SOBIR1*-like mutants, as well as their corresponding WTs and kinase-dead mutants, were treated with 0.1  $\mu$ M *Avr4* protein, followed by measuring the production of ROS. ROS production is expressed as RLUs, and the data are represented as mean + SEM (n=12). Similar to *SOBIR1 WT*, all tested *SOBIR1 Ser/Thr* mutants restored the *Avr4/Cf-4*-triggered ROS production in this complementation study, except for *S/SOBIR1 T513A* and *S/SOBIR1-like T526A*. Only the results for *S/SOBIR1 WT*, *T513A* and *D473N* are shown in (**e**), and the results for *S/SOBIR1-like WT*, *T526A*, and *D486N* are shown in (**i**). Experiments were repeated at least three times, with similar results. Source data are provided as a Source Data file.

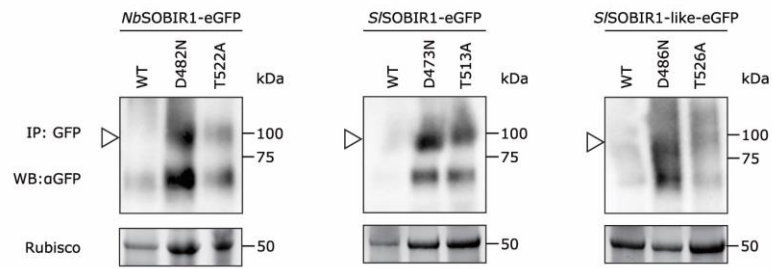

**Supplementary Figure 3. Accumulation levels of *NbSOBIR1* T522A, *S/SOBIR1* T513A and *S/SOBIR1*-like T526A *in planta*, in comparison to their WT and kinase-dead (“RN”) versions.**

*NbSOBIR1* T522A, *S/SOBIR1* T513A and *S/SOBIR1*-like T526A, which fail to restore the *Avr4*-triggered HR in *N. benthamiana*:*Cf-4 sobir1* knock-out plants, were transiently co-expressed in *N. benthamiana*:*Cf-4 sobir1* plants with *Avr4* (both at an OD<sub>600</sub> of 0.8). Transient expression of their respective WT and kinase-dead D to N version, in combination with *Avr4*, was included as positive and negative controls, respectively. Leaf samples were collected at 2 dpi and total protein extracts were subjected to immuno-purification (IP) using GFP-affinity beads, followed by western blotting (WB) with αGFP antibody (upper panels). The amount of total protein that was used for the IP is reflected by the Rubisco band present in the total protein extracts loaded on SDS gel (lower panels). Arrowheads indicate the band corresponding to SOBIR1-eGFP. Note that transient expression of WT *SOBIR1* in combination with *Avr4* results in cell death, thereby causing very low WT *SOBIR1* accumulation levels.

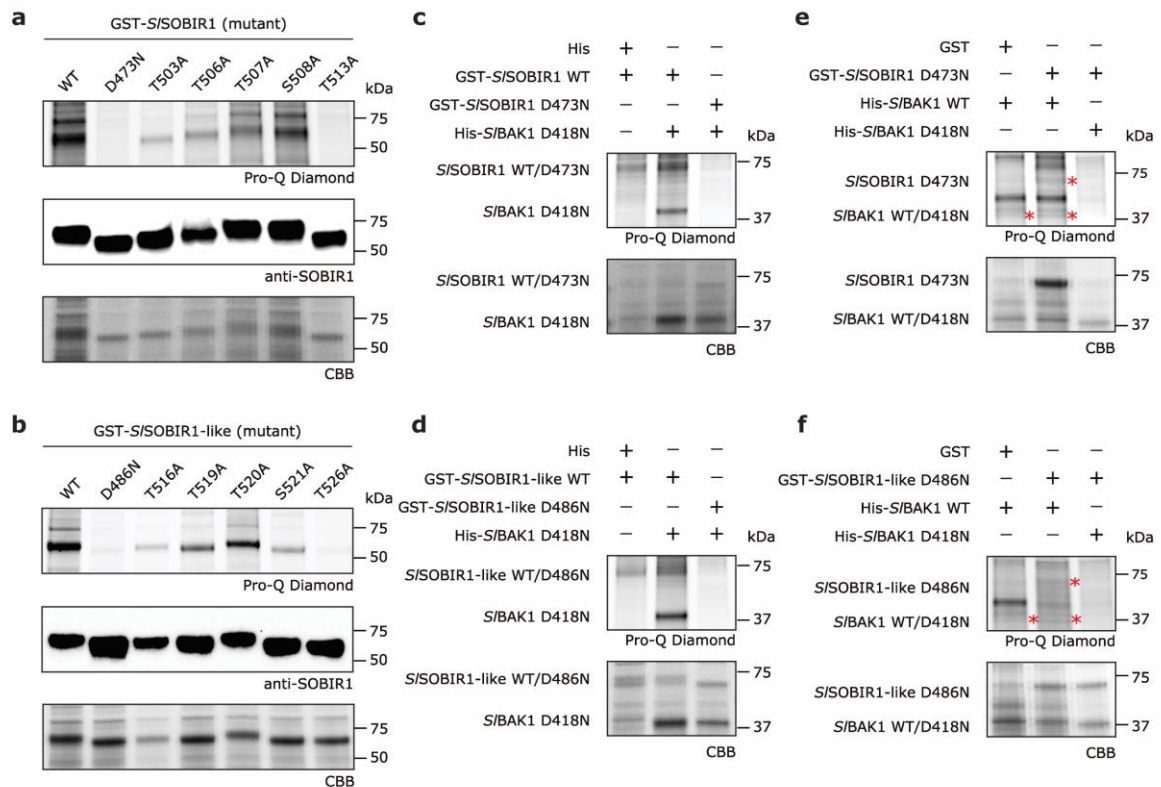

**Supplementary Figure 4. The kinase domains of SOBIR1 and BAK1 trans-phosphorylate each other *in vitro*.** **a, b**, *S/OBIR1* Thr513 and *S/OBIR1*-like Thr526 are essential for their intrinsic kinase activity. The N-terminally GST-tagged cytoplasmic kinase domains of (**a**) *S/OBIR1* WT, kinase-dead mutant D473N, and five Ser/Thr-to Ala mutants, and (**b**) *S/OBIR1*-like WT, kinase-dead mutant D486N, and five Ser/Thr-to-Ala mutants were produced in *E. coli*, followed by being subjected to western blotting and *in vitro* phosphorylation assay. The phosphorylation status of the recombinant proteins was determined by using the Pro-Q Diamond stain, which specifically stains the phosphorylated proteins (top panels). The production of SOBIR1 kinase domains was confirmed by western blotting, using SOBIR1 antibodies (middle panels), and the recombinant proteins were stained by Coomassie brilliant blue (bottom panels). **c,d**, *S/OBIR1* WT and *S/OBIR1*-like WT directly phosphorylate the kinase-dead mutant of *S/BAK1* D418N. The N-terminally GST-tagged cytoplasmic domains of *S/OBIR1* WT or D473N (**c**) and *S/OBIR1*-like WT or D486N (**d**) were co-expressed with the N-terminally His-tagged cytoplasmic domain of *S/BAK1* D418N in *E. coli*. After SDS-PAGE of the *E. coli* lysates, a Pro-Q Diamond stain was employed to detect the phosphorylated recombinant proteins (top panels), while Coomassie brilliant blue was used to visualize all proteins (bottom panels). **e,f**, *S/BAK1* WT directly phosphorylates the kinase-dead mutant of *S/OBIR1* D473N and *S/OBIR1*-like D486N. The cytoplasmic domain of *S/BAK1* WT or D418N, which was fused to a His tag at its N-terminus, was co-expressed with the cytoplasmic domain of *S/OBIR1* D473N (**e**) or *S/OBIR1*-like D486N (**f**), which was fused to a GST tag at its N-terminus, in *E. coli*. The recombinant proteins were then subjected to SDS-PAGE, followed by being stained by Pro-Q Diamond stain (top panels) and Coomassie brilliant blue (bottom panels). Bands with the expected sizes are indicated with an asterisk.

Experiments were repeated at least three times with similar results, and representative pictures are shown. Source data are provided as a Source Data file.

355

Nicotiana benthamiana\_Niben101Scf03816g01001.1 (*NbSOBIR1*) VASLEMIGKGGCGEVYRAELPGSNGKIIAIIKKIIQPPMDAAELTEEDTKALNKKMRQVKSEIQILGQIRHRNLLPLL  
Solanum lycopersicum\_Solyc06g071810.1 (*S/SOBIR1*) VASLEMIGKGGCGEVYRAELPGSNGKIIAIIKKIIQSPMDAAEITEEDTKALNKKMRQVKSEIQIVGQIRHRNLLPLL  
Solanum lycopersicum\_Solyc03g111800.2 (*S/SOBIR1*-like) LESLELIGQGGCGKVIKAAALPGSDGKIIAVKKIIQPPKDAEELTEEDSKAMNKKMRQIKSEIKIVGQIRHRNLLPLL  
Arabidopsis\_thaliana\_AT2G31880 (*AtSOBIR1*) LASLELIGRGGCGEVFKAAELPGSNGKIIAVKKIIQPPKDAEELTEEDSKFLNKKMRQIRSEINTVGHIRHRNLLPLL  
Nicotiana tabacum\_A0A1S3XP18 VASLEMIGKGGCGEVYRAELPGSNGKIIAIIKKIIQPPMDAAELTEEDTKALNKKMRQVKSEIQILGQIRHRNLLPLL  
Nicotiana sylvestris\_A0A1U7WH59 VASLEMIGKGGCGEVYRAELPGSNGKIIAIIKKIIQPPMDAAELTEEDTKALNKKMRQVKSEIQILGQIRHRNLLPLL  
Nicotiana attenuata\_A0A1J6INR1 VASLEMVGGKGGCGEVYRAELPGSNGKIIAIIKKIIQPPMDAAELTEEDTKALNKKMRQVKSEIQILGQIRHRNLLPLL  
Nicotiana tabacum\_A0A1S3ZD83 VASLEMIGKGGCGEVYRAELPGSNGKIIAIIKKIIQPPMDAAELTEEDTKALNKKMRQVKSEIQILGQIRHRNLLPLL  
Solanum tuberosum\_M1CKT4 VASLEMIGKGGCGEVYRAELPGSNGKIIAIIKKIIQSPMDAAEITEEDTKALNKKMRQVKSEIQIVGQIRHRNLLPLL  
Capsicum chinense\_A0A2G3BFP7 VASLEMVGGKGGCGEVYRAELPGSNGKIIAIIKKIIQPPMDAAEITEEDTKALNKKMRQVKSEIQIVGQIRHRNLLPLL  
Capsicum baccatum\_A0A2G2WM84 VASLEMIGKGGCGEVYRAELPGSNGKIIAIIKKIIQPPMDAAEITEEDTKALNKKMRQVKSEIQIVGQIRHRNLLPLL  
Capsicum annuum\_A0A2G2Y0L5 VASLEMIGKGGCGEVYRAELPGSNGKIIAIIKKIIQPPMDAAEITEEDTKALNKKMRQVKSEIQIVGQIRHRNLLPLL  
Solanum tuberosum\_M1B7X0 LESLELIGQGGCGKVIKAAALPGSDGKIIAVKKIIQPPMDAAELTEEDSKAMSKMRQIKSEIKIVGQIRHRNLLPLL  
Capsicum chinense\_A0A2G3CCQ8 FESLELIGEGGCGKVIKAAELPGSNGKIIAVKKIIQPPMDAAELTEEDSKAMHKKMRQIKSEIKIVGQIRHRNLLPLL  
Capsicum annuum\_A0A1U8G6T0 FESLELIGEGGCGKVIKAAELPGSNGKIIAVKKIIQPPMDAAELTEEDSKAMHKKMRQIKSEIKIVGQIRHRNLLPLL  
Capsicum baccatum\_A0A2G2X8C5 FESLELIGEGGCGKVIKAAELPGSNGKIIAVKKIIQPPMDAAELTEEDSKAMHKKMRQIKSEIKIVGQIRHRNLLPLL  
Nicotiana attenuata\_A0A314KS23 LALLELIRKGGCGEVYKAAELPGSNGKIIAIIKKIIVPPKDAEELTEEDSKALNKKMRQIKSEIKIVGQIRHRNLLPLL  
Coffea arabica\_A0A6P6X9H5 IARLEVIGRGGCGEVYKAAELPGSNGKIIAIIKKIIQPPMDAAELTEEDSKALHKKMRQIKSEIQTVGQIRHRNLLPLL  
Coffea arabica\_A0A6P6X153 IARLEVIGRGGCGEVYKAAELPGSNGKIIAIIKKIIQPPMDAAELTEEDSKALHKKMRQIKSEIQTVGQIRHRNLLPLL  
Coffea canephora\_A0A068V365 IARLEVIGRGGCGEVYKAAELPGSNGKIIAIIKKIIQPPMDAAELTEEDSKALHKKMRQIKSEIQTVGQIRHRNLLPLL  
Sesamum indicum\_A0A6I9SRZ7 LASLDVIGRGGCGEVFKAVLPGSNGKIIAIIKKIIQPPMDAAELTEEDSKMMNKKMRQIRSEIQTVGQIRHRNLLPLL  
Olea europaea subsp. europaea\_A0A8S0R730 LNLGELVIGRGGCGEVYKATLPGTNGKIIAVKKIIQPPMDAAELTEEDSKLNNKKMRQIRSEIQTVGQIRHRNLLPLL  
Camellia sinensis var. sinensis\_A0A4S4DBV0 LASLELIGSGGCGIVYKAAELPGSNGKIIAIIKKIIQPPMDAAELTEEDSKLNNKKMRQIRSEIQTVGQIRHRNLLPLL  
Rhododendron simsii\_A0A834L953 LASLELIGRGGCGEVYKAAELPGSNGKIIAIIKKIIQPPMDAAELTEEDSKLNNKKMRQIRSEIQTVGQIRHRNLLPLL  
Vitis vinifera\_F6GTQ3 LASLELIGKGGCGEVYRAELPGSNGKIIAIIKKIIQPPMDAAELTEEDSKLNNKKMRQIRSEIQTVGQIRHRNLLPLL

426 429 431 469

Nicotiana benthamiana\_Niben101Scf03816g01001.1 (*NbSOBIR1*) AHMPRPDCHYLVEEYMKNGSLQDILQQVTEGTRREL DWLGRHR IAVG IASGLEYLHINHNSQCI IHRDLKPANVLLDDD  
Solanum lycopersicum\_Solyc06g071810.1 (*S/SOBIR1*) AHMPRPDCHYLVEEYMKNGSLQDILQQVTEGTRREL DWLGRHR IAVGVAAGLEYLHINHNSQCI IHRDLKPANVLLDDD  
Solanum lycopersicum\_Solyc03g111800.2 (*S/SOBIR1*-like) AHMPRPDCHYLVEEYMKNGSLQDILQQVREGKREL DWSARHR IAVGVAAGLEYLHINHNSQCI IHRDLKPGNVLLDDD  
Arabidopsis\_thaliana\_AT2G31880 (*AtSOBIR1*) AHVSRPECHYLVEEYMEKNGSLQDILTQVQAGNQLMWP ARHK IALG IAVGLEYLHMDHNPRI IHRDLKPANVLLDDD  
Nicotiana tabacum\_A0A1S3XP18 AHMPRPDCHYLVEEYMKNGSLQDILQQVTEGTRREL DWLGRHR IAVG IAVGLEYLHINHNSQCI IHRDLKPANVLLDDD  
Nicotiana sylvestris\_A0A1U7WH59 AHMPRPDCHYLVEEYMKNGSLQDILQQVTEGTRREL DWLGRHR IAVG IAVGLEYLHINHNSQCI IHRDLKPANVLLDDD  
Nicotiana attenuata\_A0A1J6INR1 AHMPRPDCHYLVEEYMKNGSLQDILQQVTEGTRREL DWLGRHR IAVG IAVGLEYLHINHNSQCI IHRDLKPANVLLDDD  
Nicotiana tabacum\_A0A1S3ZD83 AHMPRPDCHYLVEEYMKNGSLQDILQQVTEGTRREL DWLGRHR IAVG IAVGLEYLHINHNSQCI IHRDLKPANVLLDDD  
Solanum tuberosum\_M1CKT4 AHMPRPDCHYLVEEYMKNGSLQDILQQVTEGTRREL DWLGRHR IAVGVAAGLEYLHINHNSQCI IHRDLKPANVLLDDD  
Capsicum chinense\_A0A2G3BFP7 AHMPRPDCHYLVEEYMKNGSLQDILQQVTEGTRREL DWLGRHR IAVG IAVGLEYLHINHNSQCI IHRDLKPANVLLDDD  
Capsicum baccatum\_A0A2G2WM84 AHMPRPDCHYLVEEYMKNGSLQDILQQVTEGTRREL DWLGRHR IAVG IAVGLEYLHINHNSQCI IHRDLKPANVLLDDD  
Capsicum annuum\_A0A2G2Y0L5 AHMPRPDCHYLVEEYMKNGSLQDILQQVTEGTRREL DWLGRHR IAVG IAVGLEYLHINHNSQCI IHRDLKPANVLLDDD  
Solanum tuberosum\_M1B7X0 AHMPRPDCHYLVEEYMKNGSLQDILQQVREGTREL DWSARHR IAVGVAAGLEYLHINHNSQCI IHRDLKPGNVLLDDD  
Capsicum chinense\_A0A2G3CCQ8 AHMPRPDCHYLVEEYMKNGSLQDILQQVREGTREL DWP ARHR IAVG IAVGLEYLHINHNSQCI IHRDLKPGNVLLDDD  
Capsicum annuum\_A0A1U8G6T0 AHMPRPDCHYLVEEYMKNGSLQDILQQVREGTREL DWP ARHR IAVG IAVGLEYLHINHNSQCI IHRDLKPGNVLLDDD  
Capsicum baccatum\_A0A2G2X8C5 AHMPRPDCHYLVEEYMKNGSLQDILQQVREGTREL DWP ARHR IAVG IAVGLEYLHINHNSQCI IHRDLKPGNVLLDDD  
Nicotiana attenuata\_A0A314KS23 AHMPRPDCHYLVEEYMKNGSLQDILQQVTEGTRREL DWSARHR IAVG IAVGLEYLHINHNSQCI IHRDLKPANVLLDDD  
Coffea arabica\_A0A6P6X9H5 AHMPRPDCHYLVEEYMKNGSLQDMLQKVAAGENEL DWLGRHR IAVGVAAGLEYLHVNHTPRI IHRDLKPANVLLDDD  
Coffea arabica\_A0A6P6X153 AHMPRPDCHYLVEEYMKNGSLQDMLQKVAAGENEL DWLGRHR IAVGVAAGLEYLHVNHTPRI IHRDLKPANVLLDDD  
Coffea canephora\_A0A068V365 AHMPRPDCHYLVEEYMKNGSLQDMLQKVAAGENEL DWLGRHR IAVGVAAGLEYLHVNHTPRI IHRDLKPANVLLDDD  
Sesamum indicum\_A0A6I9SRZ7 AHLPRPDCHYLVEEYMKNGSLQDMLQKVAAGENEL DWLGRHR IAVGVAAGLEYLHVNHTPRI IHRDLKPANVLLDDD  
Olea europaea subsp. europaea\_A0A8S0R730 AHLPRPDCHYLVEEYMKNGSLQDMLQKVAAGENEL DWLGRHR IAVGVAAGLEYLHVNHTPRI IHRDLKPANVLLDDD  
Camellia sinensis var. sinensis\_A0A4S4DBV0 AHVSRPDCHYLVEEYMKNGSLQDILNQVSGTREL DWQARHK IAVGVAAGLEYLHVNHTPRI IHRDLKPANVLLDDD  
Rhododendron simsii\_A0A834L953 AHVSRPDCHYLVEEYMKNGSLQDILNQVSGTREL DWQARHK IAVGVAAGLEYLHVNHTPRI IHRDLKPANVLLDDD  
Vitis vinifera\_F6GTQ3 AHVSRPNCHYLVEEYMKNGSLQDMLQKVAAGENEL DWLGRHR IAVGVAAGLEYLHVNHTPRI IHRDLKPGNVLLDDD

525      530      543

Nicotiana benthamiana\_Niben101Scf03816g01001.1 (*NbSOBIR1*) MEAR I ADFGLAKALPDAHTHVTTSNVAGTVGY I APEYHQTLKFTGKCDI Y SFGVVLAVLVIGKLPSEFFQHTPEMS  
Solanum lycopersicum\_Solyc06g071810.1 (*S/SOBIR1*) MEARVADDFGLAKAVPDAHTHITTSNVAGTVGF I APEYHQTLKFTDKCDI Y SFGVVLAVLVIGKGPSDDFFQHTSEMS  
Solanum lycopersicum\_Solyc03g111800.2 (*S/SOBIR1*-like) MEAR I ADFGLAKAVPDAHTHITTSNVAGTIGY I APEYHQTLKFTDKCDI Y SFGVLLGVLMGKLPSEFFQHTSEMS  
Arabidopsis\_thaliana\_AT2G31880 (*AtSOBIR1*) MEAR I SDFGLAKAMPDAVTHITTSNVAGTVGY I APEYHQTHKFTDKCDI Y SFGVILGILVIGKLPSEFFQHTDEMS  
Nicotiana tabacum\_A0A1S3XP18 MEAR I ADFGLAKALPDAHTHITTSNVAGTVGY I APEYHQTLKFTDKCDI Y SFGVVLAVLVIGKLPSEFFQHTPEMS  
Nicotiana sylvestris\_A0A1U7WH59 MEAR I ADFGLAKAVPDAHTHITTSNVAGTVGY I APEYHQTLKFTDKCDI Y SFGVVLAVLVIGKLPSEFFQHTPEMS  
Nicotiana attenuata\_A0A1J6INR1 MEAR I ADFGLAKALPDAHTHITTSNVAGTVGY I APEYHQTLKFTDKCDI Y SFGVVLAVLVIGKLPSEFFQHTPEMS  
Nicotiana tabacum\_A0A1S3ZD83 MEAR I ADFGLAKAVPDAHTHVTTSNVAGTVGY I APEYHQTLKFTDKCDI Y SFGVVLAVLVIGKLPSEFFQHTPEMS  
Solanum tuberosum\_M1CKT4 MEAR I ADFGLAKAVPDAHTHITTSNVAGTMGY I APEYHQTLKFTDKCDI Y SFGVVLAVLVIGKGPSDEFQHTSEMS  
Capsicum chinense\_A0A2G3BFP7 MEPR I ADFGLAKAVPDAHTHVTTSNVAGTVGY I APEYHQTLKFTDKCDI Y SFGVVLAVLVVVGKLPSSDDFFQHTSEMS  
Capsicum baccatum\_A0A2G2WM84 MEAR I ADFGLAKAVPDAHTHVTTSNVAGTVGY I APEYHQTLKFTDKCDI Y SFGVVLAVLVIGKLPSSDDFFQHTSEMS  
Capsicum annuum\_A0A2G2Y0L5 MEPR I ADFGLAKAVPDAHTHVTTSNVAGTVGY I APEYHQTLKFTDKCDI Y SFGVVLAVLVVVGKLPSSDDFFQHTSEMS  
Solanum tuberosum\_M1B7X0 MEAR I ADFGLAKAVPDAHTHITTSNVAGTIGY I APEYHQTLKFTDKCDI Y SFGVLLGVLMGKLPSEFFQNTSEMS  
Capsicum chinense\_A0A2G3CCQ8 LEAR I ADFGLAKAVPDAHTHITTSNVAGTIGY I APEYHQTLKFTDKCDI Y SFGVLLGVLMGKLPSEFFQNTSEMS  
Capsicum annuum\_A0A1U8G6T0 LEGR I ADFGLAKAVPDAHTHITTSNVAGTIGY I APEYHQTLKFTDKCDI Y SFGVLLGVLMGKLPSEFFQNTSEMS  
Capsicum baccatum\_A0A2G2X8C5 LEPR I ADFGLAKAVPDAHTHITTSNVAGTIGY I APEYHQTLKFTDKCDI Y SFGVLLGVLMGKLPSEFFQNTSEMS  
Nicotiana attenuata\_A0A314KS23 MEAR I ADFGLAKAIPESLTHVSTSHVVGLGY I APAYYQTVKFTDKCDI Y SFGVLLGVLMGKFPSEDFLQFPASGMG  
Coffea arabica\_A0A6P6X9H5 MEAR I ADFGLAKAMPEAYTHVTSNVVGTLY I APEYHQTLKFTDKCDI Y SFGVLLASLVMGKLPSEFFQHTDEM  
Coffea arabica\_A0A6P6X153 MEAR I ADFGLAKAMPEAYTHVTSNVVGTLY I APEYHQTLKFTDKCDI Y SFGVLLASLVMGKLPSEFFQHTDEM  
Coffea canephora\_A0A068V365 MEAR I ADFGLAKAMPEAYTHVTSNVVGTLY I APEYHQTLKFTDKCDI Y SFGVLLASLVMGKLPSEFFQHTDEM  
Sesamum indicum\_A0A6I9SRZ7 MEAR I ADFGLAKAMPDANTHVTTSNVAGTVGY I APEYHQTFKFTDKCDI Y SFGVVLGVLMGKLPSSDDFFQHTDEL  
Olea europaea subsp. europaea\_A0A8S0R730 MEAR I ADFGLAKAVPEANTHVSTSNVAGTAGY I APEYHQTFKFTDKCDI Y SFGVVLGALTMGKFPSEFFQHTTEEMH  
Camellia sinensis var. sinensis\_A0A4S4DBV0 MEAR I ADFGLAKAVPDAHTHVTTSNVAGTVGY I APEYHQTLKFTDKCDI Y SFGVLLGVLVIGKLPSSDDFFQHTSEMS  
Rhododendron simsii\_A0A834L953 MEAR I ADFGLAKAVPDQDTHVTTSNVAGTVGY I APEYHQTMKFTDKCDI Y SFGVLLGVLVIGRLPSDNFFQDTSEMS  
Vitis vinifera\_F6GTQ3 MEAR I ADFGLAKAVPDANTHVTTSNVAGTVGY I APEYHQTLKFTDKCDI Y SFGVLLGVLVVVGKLPSSDDFFQHTAEMS

▼

Nicotiana benthamiana\_Niben101Scf03816g01001.1 (*NbSOBIR1*) LVKWL RNVMT SEDPKRA I DSKL I GNGFEEQML LVLK I ACFCTLENPKERPNSKDVRCMLTQ I KH - - - - -  
Solanum lycopersicum\_Solyc06g071810.1 (*S/SOBIR1*) LVKWL RNVMT SDDPK I A I DPKL I GNGYEEQML LVLK I ACFCTLDNPKERPNSKDVRCMLTQ I KH - - - - -  
Solanum lycopersicum\_Solyc03g111800.2 (*S/SOBIR1*-like) LVKWMRNVMT SEDPNRA I DPKLMGNGNEEQML LVLK I ACFCTMENPKERPNSKDVRCMLMQ I KH - - - - -  
Arabidopsis\_thaliana\_AT2G31880 (*AtSOBIR1*) L I KWMRNI I TSENPSL A I DPKLMQGGFEEQML LVLK I ACYCTLD DPKQRPNSKDVRCMLTQ I KH - - - - -  
Nicotiana tabacum\_A0A1S3XP18 LVKWL RNVMT SEDPKRA I DPKL I GTGFEEQML LVLK I ACFCTLENPKERPNSKDVRCMLTQ I KH - - - - -  
Nicotiana sylvestris\_A0A1U7WH59 LVKWL RNVMT SEDPKRA I DPKL I GTGFEEQML LVLK I ACFCTLENPKERPNSKDVRCMLTQ I KH - - - - -  
Nicotiana attenuata\_A0A1J6INR1 LVKWL RNVMT SEDPKRA I DQKL I GNGFEEQML LVLK I ACFCTLENPKERPNSKDVRCMLTQ I KH - - - - -  
Nicotiana tabacum\_A0A1S3ZD83 LVKWL RNVMT SEDPKRA I DPKL I GSGFEEQML LVLK I ACFCTLENPKERPNSKDVRCMLTQ I KH - - - - -  
Solanum tuberosum\_M1CKT4 LVKWL RNVMT SDDPK I A I DPKLRNGYEEQML LVLK I ACFCTLDNPKERPNSKDVRCMLTQ I KH - - - - -  
Capsicum chinense\_A0A2G3BFP7 LVKWL RNVMT SDDPKRA I DPNL I GNGYEEQML LVLK I ACFCTMDNPKERPNSKDVRCMLTQ I KH - - - - -  
Capsicum baccatum\_A0A2G2WM84 LVKWL RNVMT SDDPKRA I DPNL I GNGYEEQML LVLK I ACFCTMDNPKERPNSKDVRCMLTQ I KH - - - - -  
Capsicum annuum\_A0A2G2Y0L5 LVKWL RNVMT SDDPKRA I DPNL I GNGYEEQML LVLK I ACFCTMDNPKERPNSKDVRCMLTQ I KH - - - - -  
Solanum tuberosum\_M1B7X0 LVKWMRNVMT SEDPNRA I DPKLMGNGNEEQML LVLK I ACFCTLENPKERPNSKDVRCMLMQ I KH - - - - -  
Capsicum chinense\_A0A2G3CCQ8 LVKWMRNVMT SEDPNRA I DPKLMGNGNEEQML LVLK I ACFCTLENPKERPNSKDVRCMLMQ I KH - - - - -  
Capsicum annuum\_A0A1U8G6T0 LVKWMRNVMT SEDPNRA I DPKLMGNGNEEQML LVLK I ACFCTLENPKERPNSKEVRCMLMQ I KH - - - - -  
Capsicum baccatum\_A0A2G2X8C5 LVKWMRNVMT SEDPNRA I DPKLMGNGNEEQML LVLK I ACFCTLENPKERPNSKEARCMMLMQ I KH - - - - -  
Nicotiana attenuata\_A0A314KS23 LVKWMRNVMT SENPKRA I DPKLMGNGYEEQML LVLK I ACFCTLDNPKERPNSKDVRCMLTQ I KP - - - - -  
Coffea arabica\_A0A6P6X9H5 LVHWMRNVMT SEDPKRA I DPKLLGNGYEEQML LVLK I ACFCTLDNPKERPNS IDIRAML FQ I K Y EKRQVM  
Coffea arabica\_A0A6P6X153 LVLWVRNVMT SEDPKRA I DPKLLGNGYEEQML LVLK I ACFCTLENPKERPNS IDIRAML FQ I K Y EKR - - -  
Coffea canephora\_A0A068V365 LVLWVRNVMT SEDPKRA I DPKLLGNGYEEQML LVLK I ACFCTLENPKERPNS IDIRAML FQ I K Y EKR - - -  
Sesamum indicum\_A0A6I9SRZ7 LVKWMRNVMT SEDPKRA I DPKLLGNGYEEQML LVLK I ACFCTLDNPKERPNSKIDARCMML FQ I KH - - - - -  
Olea europaea subsp. europaea\_A0A8S0R730 LVKWMRNVMT SEDPKRA I DPRL I GNGYEEQ I L LVLK I ACFCTLDNPKERPDSKE I RCMLTQ I KH - - - - -  
Camellia sinensis var. sinensis\_A0A4S4DBV0 LVKWMRNVMT SEDPTRA I DPRLMGNGDHENML LVLK I ACFCTLD DPKQRPNSKDVRCML SQ I KN - - - - -  
Rhododendron simsii\_A0A834L953 LVKWMRNVMT SEDPNRA I DRKL I GNGHEEKML LVLK I ACFCTLEDPKQRPNSKDVRCMLDQ I TH - - - - -  
Vitis vinifera\_F6GTQ3 LVKWMANI RTSDPSRA I DRKLMGNGFEEQML LVLK I ACFCTVDDAK I RPNKDVRCMLTQ I KH - - - - -



**Supplementary Figure 5. Alignment of the protein sequences of the SOBIR1 kinase domain from various plant species.** Amino acid sequences of the SOBIR1 homologs from various plant species were obtained from the UniProt database (<https://www.uniprot.org/>). The alignment was visualized using JalView and only the amino acid sequences of the kinase domain are shown, with all the Tyr (Y) residues highlighted in green. The Tyr residues that are subject of this study are marked with arrowheads on the top, and their position in *NbSOBIR1* is indicated on the top. The RD motif (in which a conserved arginine (R) precedes the highly conserved catalytic aspartate (D)), present in all SOBIR1 kinase domains, is indicated by a box.

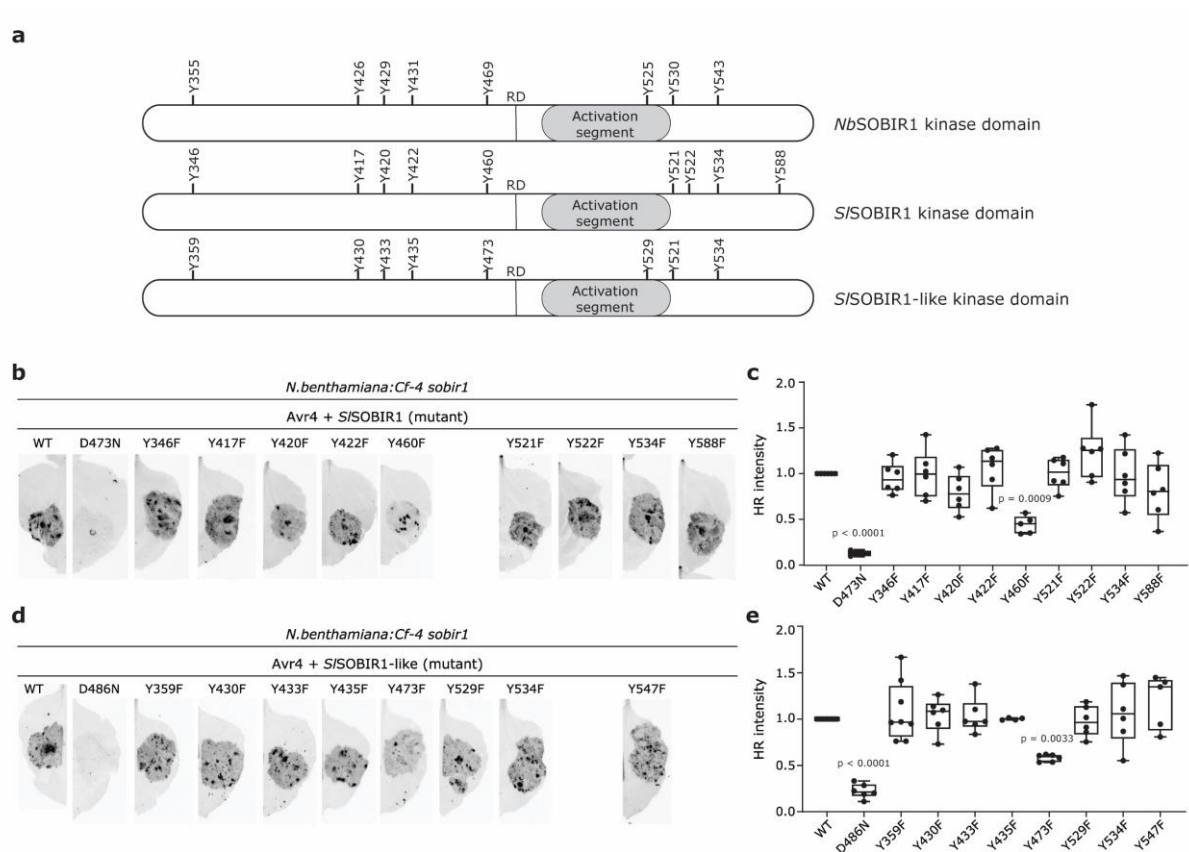

**Supplementary Figure 6. *S/SOBIR1* Tyr460 and *S/SOBIR1*-like Tyr473, which are the analogous residues of *NbSOBIR1* Tyr469, are essential for the Avr4/Cf-4-triggered HR in *N. benthamiana*.** **a**, Schematic diagrams of the kinase domains of *NbSOBIR1*, *S/SOBIR1* and *S/SOBIR1*-like, with the location of the activation segment, the RD motif, and all Tyr residues indicated. **b-e**, Mutagenesis screen of all putative Tyr phosphorylation sites in *S/SOBIR1* (**b** and **c**) and *S/SOBIR1*-like (**d** and **e**), as shown in Figure 2 for *NbSOBIR1*, to determine their importance in immune signalling by complementation. Statistical analysis was performed with an ANOVA/Dunnett's multiple comparison test, compared with their corresponding WT. Dots indicate individual values (centre line, median; error bar, minima and maxima; n=6). Experiments were repeated at least three times, with similar results and representative pictures are shown. Source data are provided as a Source Data file.

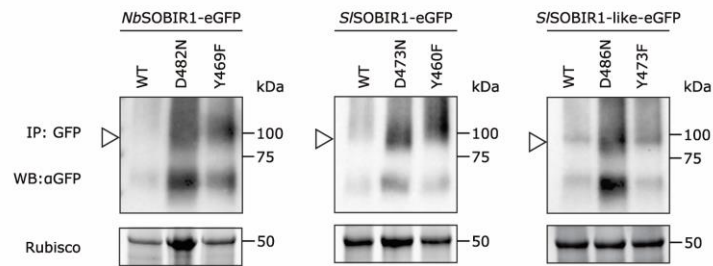

**Supplementary Figure 7. Accumulation levels of *NbSOBIR1* Y469F, *S/SOBIR1* Y460F and *S/SOBIR1*-like Y473F, as well as their corresponding WT and kinase-dead (D to N) versions, *in planta*.** *NbSOBIR1* Y469F, *S/SOBIR1* Y460F and *S/SOBIR1*-like Y473F, which fail to fully restore the Avr4-triggered HR in *N. benthamiana:Cf-4 sobir1* knock-out plants, were transiently expressed in *N. benthamiana:Cf-4 sobir1* knock-out plants in combination with Avr4 (both at an OD<sub>600</sub> of 0.8), next to their respective WT that was combined with Avr4 as a positive control, and their kinase-dead D to N version that was combined with Avr4 as a negative control. Leaf samples were collected at 2 dpi and total protein extracts were subjected to IP of the GFP-tagged SOBIR1 mutants using GFP-affinity beads, followed by WB with αGFP antibody (upper panels). The amount of total protein that was used for the IP is reflected by the Rubisco band present in the stain-free gel (lower panels). Arrowheads indicate the band representing SOBIR1-eGFP. Note that transient expression of SOBIR1 WT in combination with Avr4 triggers an HR in *N. benthamiana:Cf-4 sobir1* plants, which explains the low accumulation levels of SOBIR1 WT.

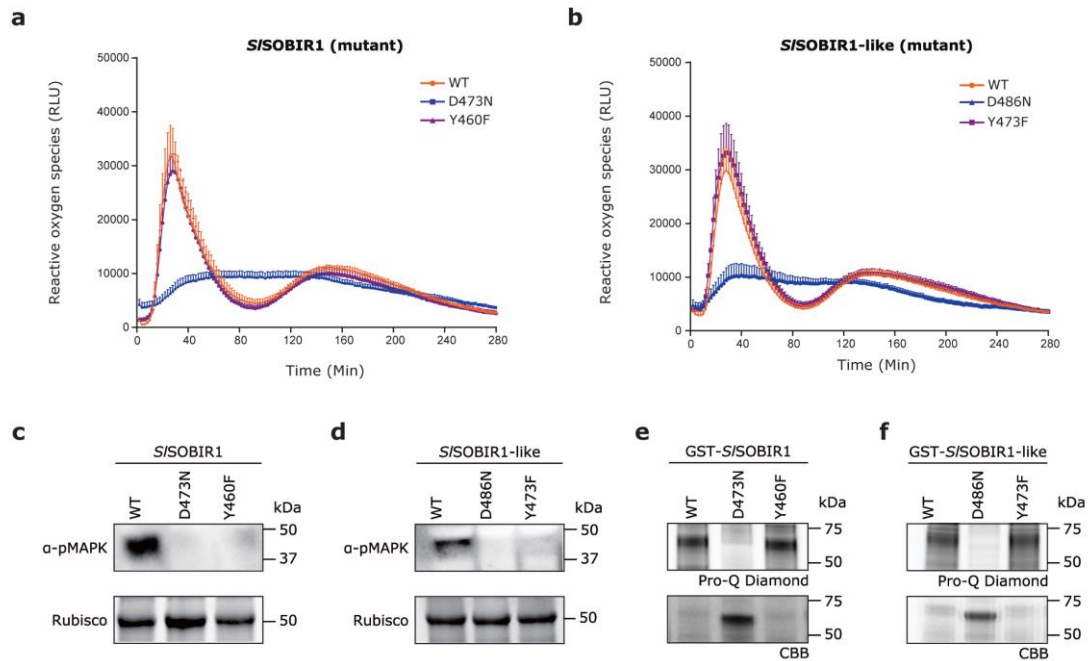

**Supplementary Figure 8. *S/SOBIR1* Tyr460 and *S/SOBIR1*-like Tyr473 are required for Avr4/Cf-4-induced MAPK activation, but not for ROS accumulation and their intrinsic kinase activity. **a,b**, The different Tyr mutants of *S/SOBIR1* and *S/SOBIR1*-like were transiently expressed in leaves of the *N. benthamiana*:*Cf-4 sobir1* knock-out line, with their corresponding WT as positive controls and kinase-dead mutants as negative controls. Leaf discs were taken from these plants at 24 hours after agro-infiltration, followed by adding 0.1  $\mu$ M Avr4 protein and measuring ROS accumulation over time. ROS production is expressed as RLUs, and the data are represented as mean + SEM. Similar to *SOBIR1* WT, all tested *SOBIR1* Tyr mutants restored the Avr4/Cf-4-triggered ROS production in this complementation study. Only the results for *S/SOBIR1* WT, Y460F and D473N are shown in (**a**), and results for *S/SOBIR1*-like WT, Y473F and D486N are shown in (**b**). **c, d**, *S/SOBIR1* Y460F and *S/SOBIR1*-like Y473F, as well as their corresponding WT and kinase-dead mutants, were transiently co-expressed with Avr4 in leaves of *N. benthamiana*:*Cf-4 sobir1* knock-out plants. Leaf samples were collected at 2 dpi and total protein extracts were subjected to immunoblotting with a p42/p44-erk antibody to determine the activation of downstream MAPKs by phosphorylation. **e, f**, The N-terminally GST-tagged cytoplasmic kinase domains of *S/SOBIR1* Y460F and *S/SOBIR1*-like Y473F were produced in *E. coli*, with their corresponding WT as positive controls and their kinase-dead mutants as negative controls. After SDS-PAGE of the *E. coli* lysates, the recombinant proteins were stained with Coomassie brilliant blue (lower panels), whereas the phosphorylation status of the kinase domains was determined by performing a Pro-Q Diamond stain (upper panels). Experiments were repeated at least three times and similar results were obtained. Representative pictures are shown. Source data are provided as a Source Data file.**

**a**

Tree scale: 0.1

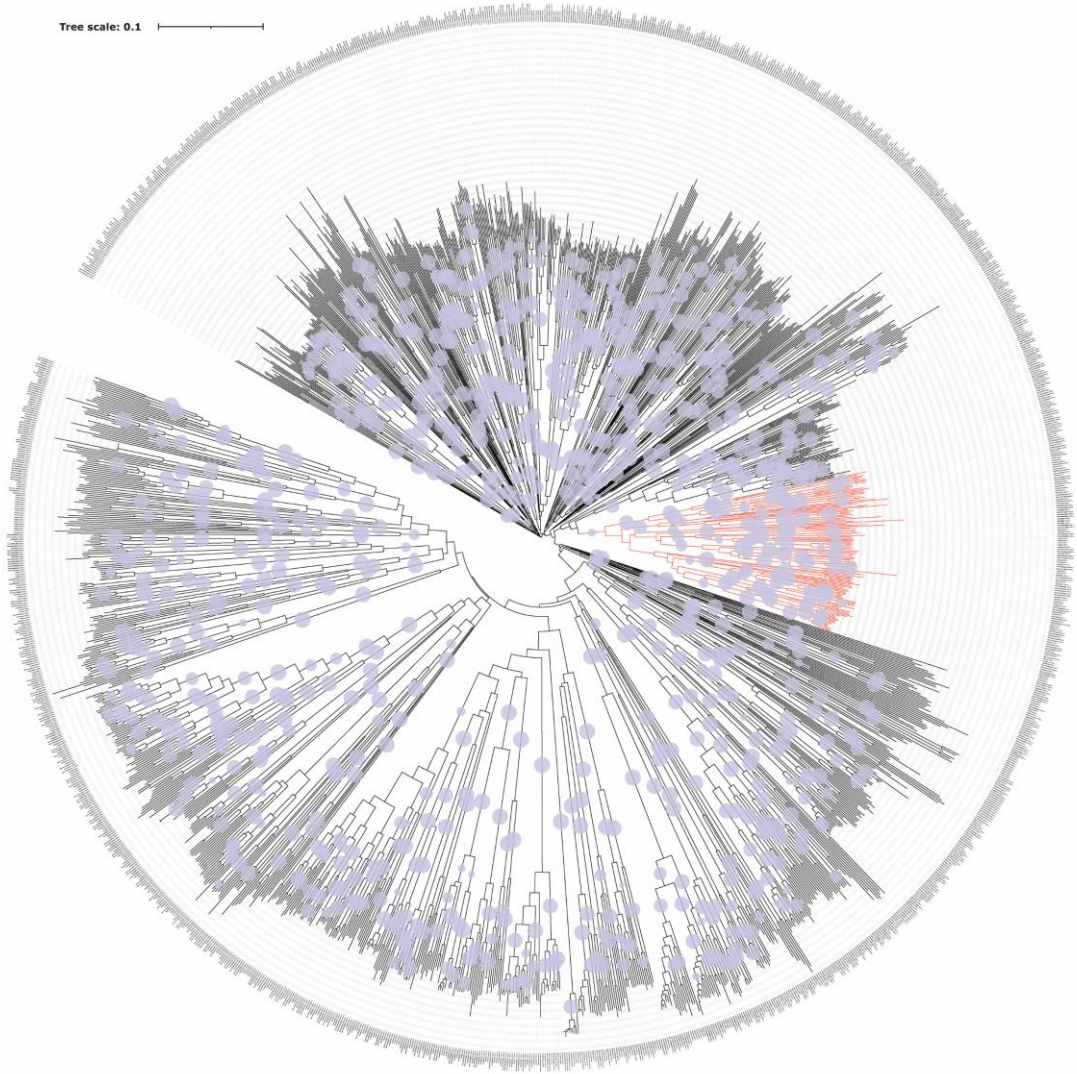

**b**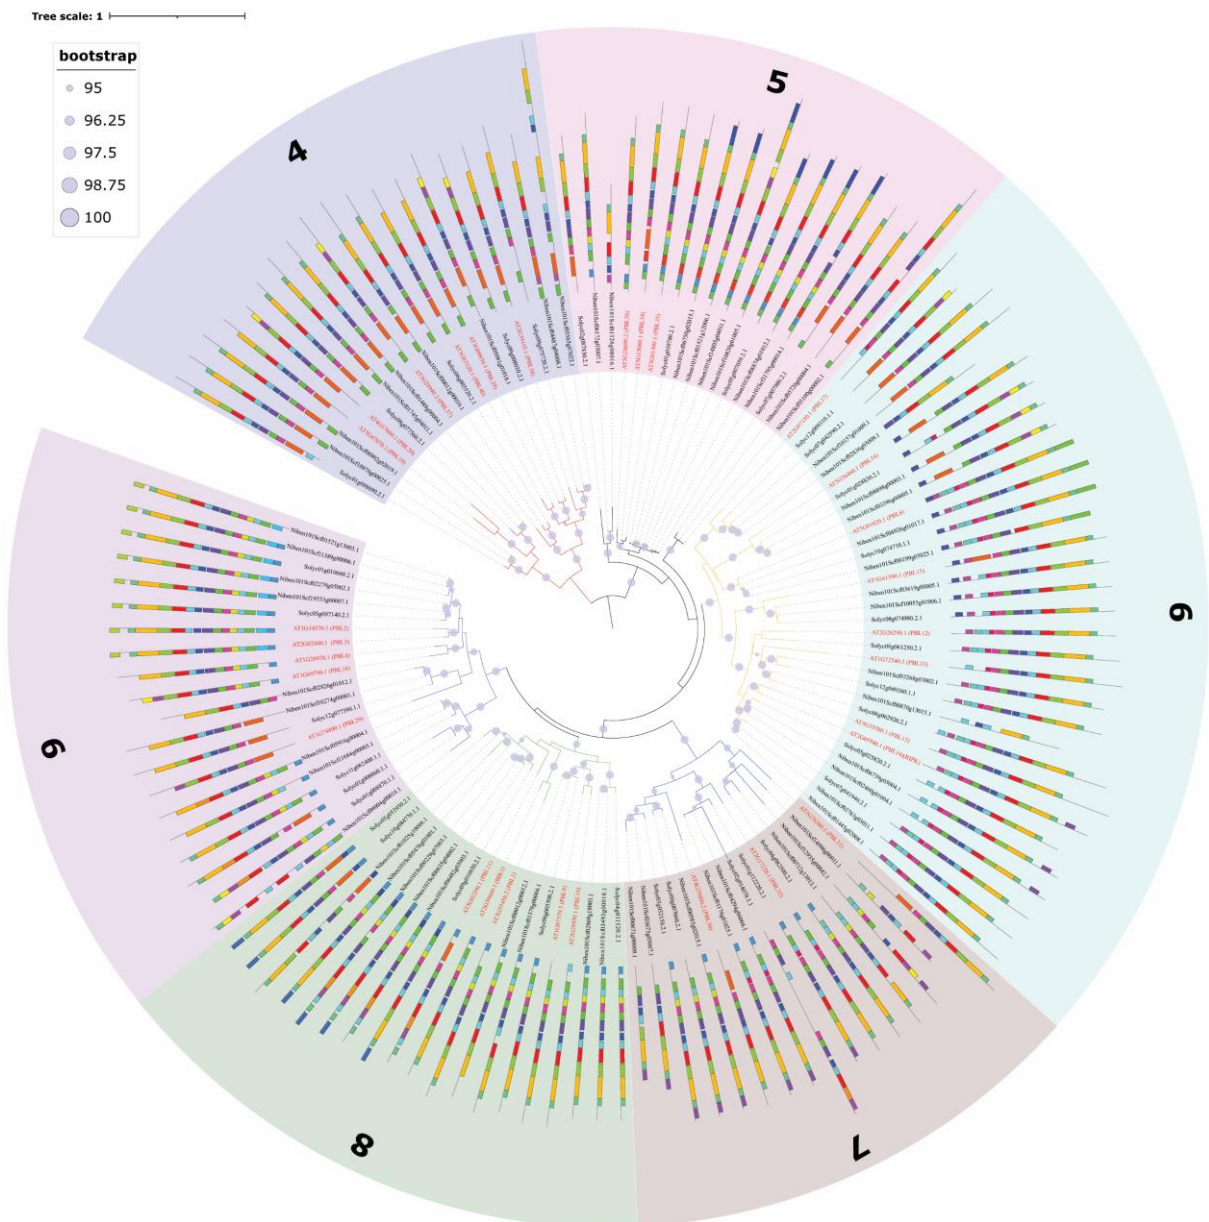

**Supplementary Figure 9. Phylogenetic analysis of BIK1 homologs from Arabidopsis, tomato, and *N. benthamiana*.** **a**, The amino acid sequences of only the kinase domain were extracted from all RLCK members from Arabidopsis, tomato, and *N. benthamiana* and aligned to subsequently generate a neighbour-joining phylogenetic tree, using QuickTree (Howe et al., 2002). The sub-clade of putative BIK1 homologs, which comprises 123 sequences, including *AtBIK1* (bootstrap support higher than 90%) is shown in red. **b**, Phylogenetic analysis of the RLCK-VII subfamily members from Arabidopsis (which are indicated in red), tomato, and *N. benthamiana*. Amino acid motifs identified in the complete protein sequence using MEME are shown (Bailey et al., 2009). All the members present in this tree were further assigned to six subfamilies, which are depicted in different colours. These subfamilies are referred to as subfamily 4, 5, 6, 7, 8, and 9, according to the RLCK-VII subfamilies in Arabidopsis reported previously by Rao et al. (2018).

**a**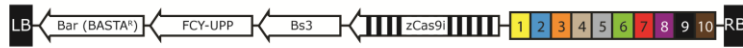**b**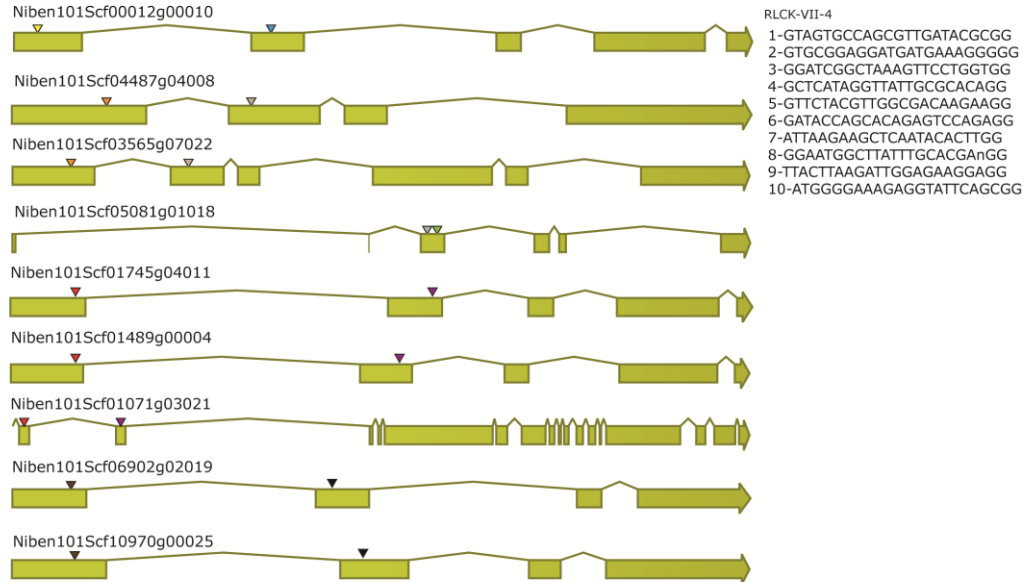**c**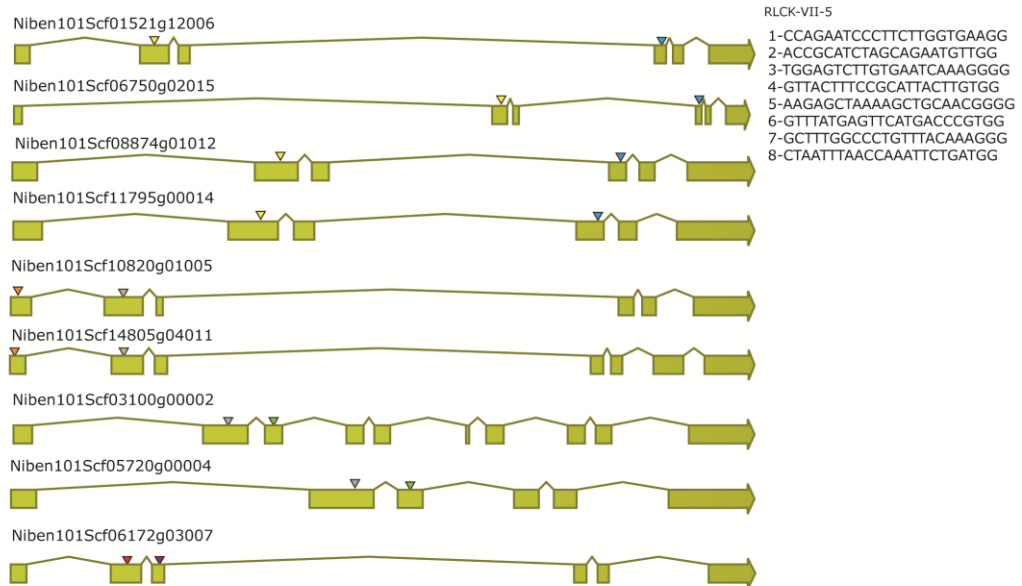

**d**

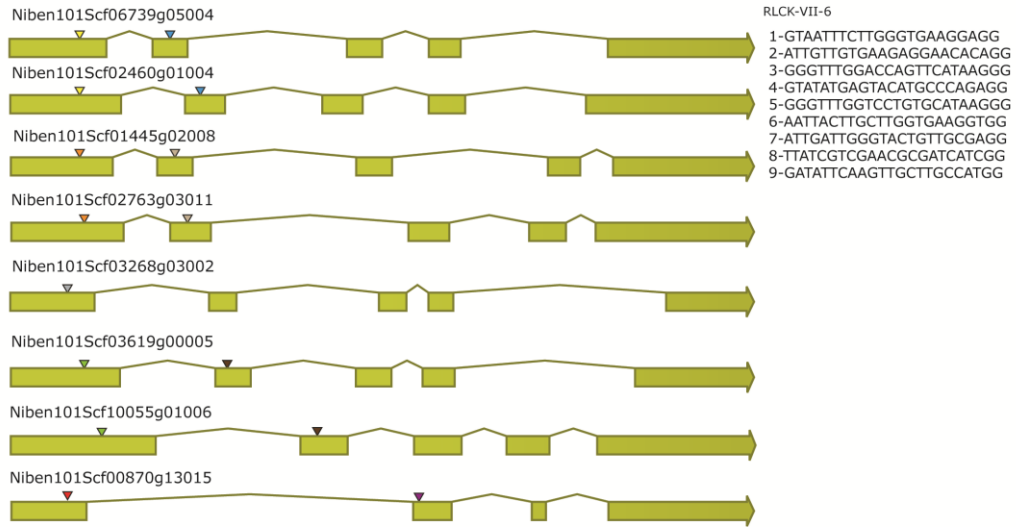

**e**

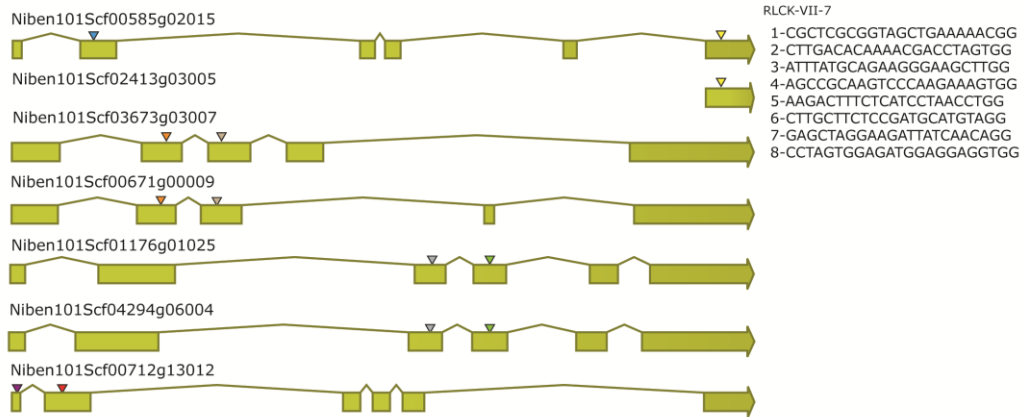



**f**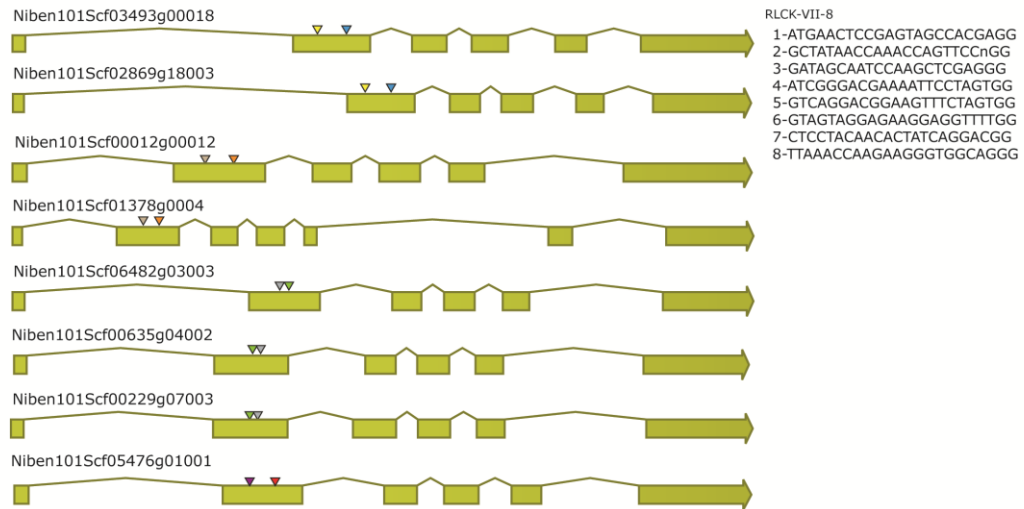**g**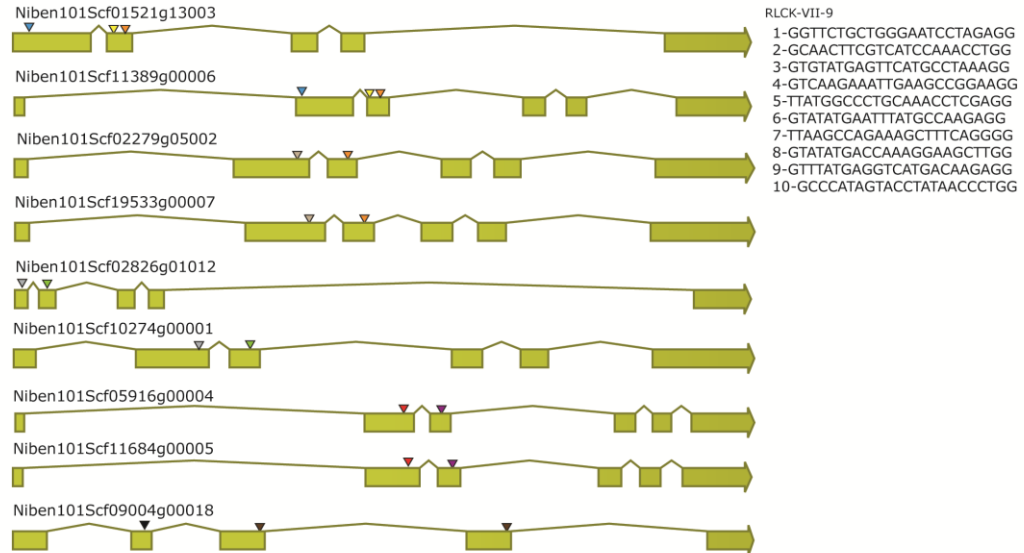**Supplementary Figure 10. Editing genes of RLCK-VII subfamilies in *N. benthamiana*:Cf-4.**

**a**, Scheme of the binary vector used for editing RLCK-VII genes. T-DNAs encompass the *Bar* gene (resistance to phosphinothricin; under control of the *nos* promoter), the FCY-UPP genes (p*AtUbp10* control)<sup>78</sup>, the *Bs3* gene from pepper (*Capsicum annuum*; own promoter), the intron-optimized *zCas9i* gene (*AtRPS5a* promoter control) and up to 10 sgRNA transcriptional units driven by an *AtU6-26* promoter fragment. **b-g**, Gene models of *RLCK-VII* genes according to the solgenomics.net *N. benthamiana* genome release v1.01, with target sites indicated (coloured triangles). The colour code used for cut sites corresponds to the sgRNA array indicated in panel **a**. The target sites of the various sgRNAs are indicated for each subfamily next to the gene models.

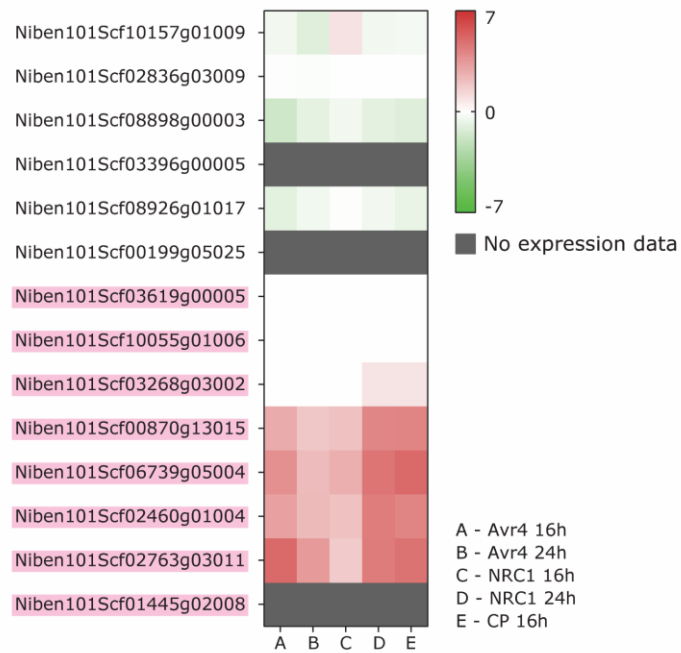

**Supplementary Figure 11. Gene expression patterns of the 14 members from *N. benthamiana* RLCK-VII-6.** Heat map of the relative expression (log<sub>2</sub>) of all 14 RLCK members of subfamily 6, as determined upon transient expression of Avr4, constitutively active NRC1 (Gabiëls et al., 2007), or the coat protein (CP) of potato virus X (Tameling et al., 2010), in leaves of *N. benthamiana* plants transgenic for both *Cf-4* and *Rx*, with the latter gene mediating recognition of the CP of PVX. The RLCK-encoding genes that were selected to be knocked out are highlighted in pink. NRC1, NB-LRR PROTEIN REQUIRED FOR HR-ASSOCIATED CELL DEATH 1; CP, coat protein.

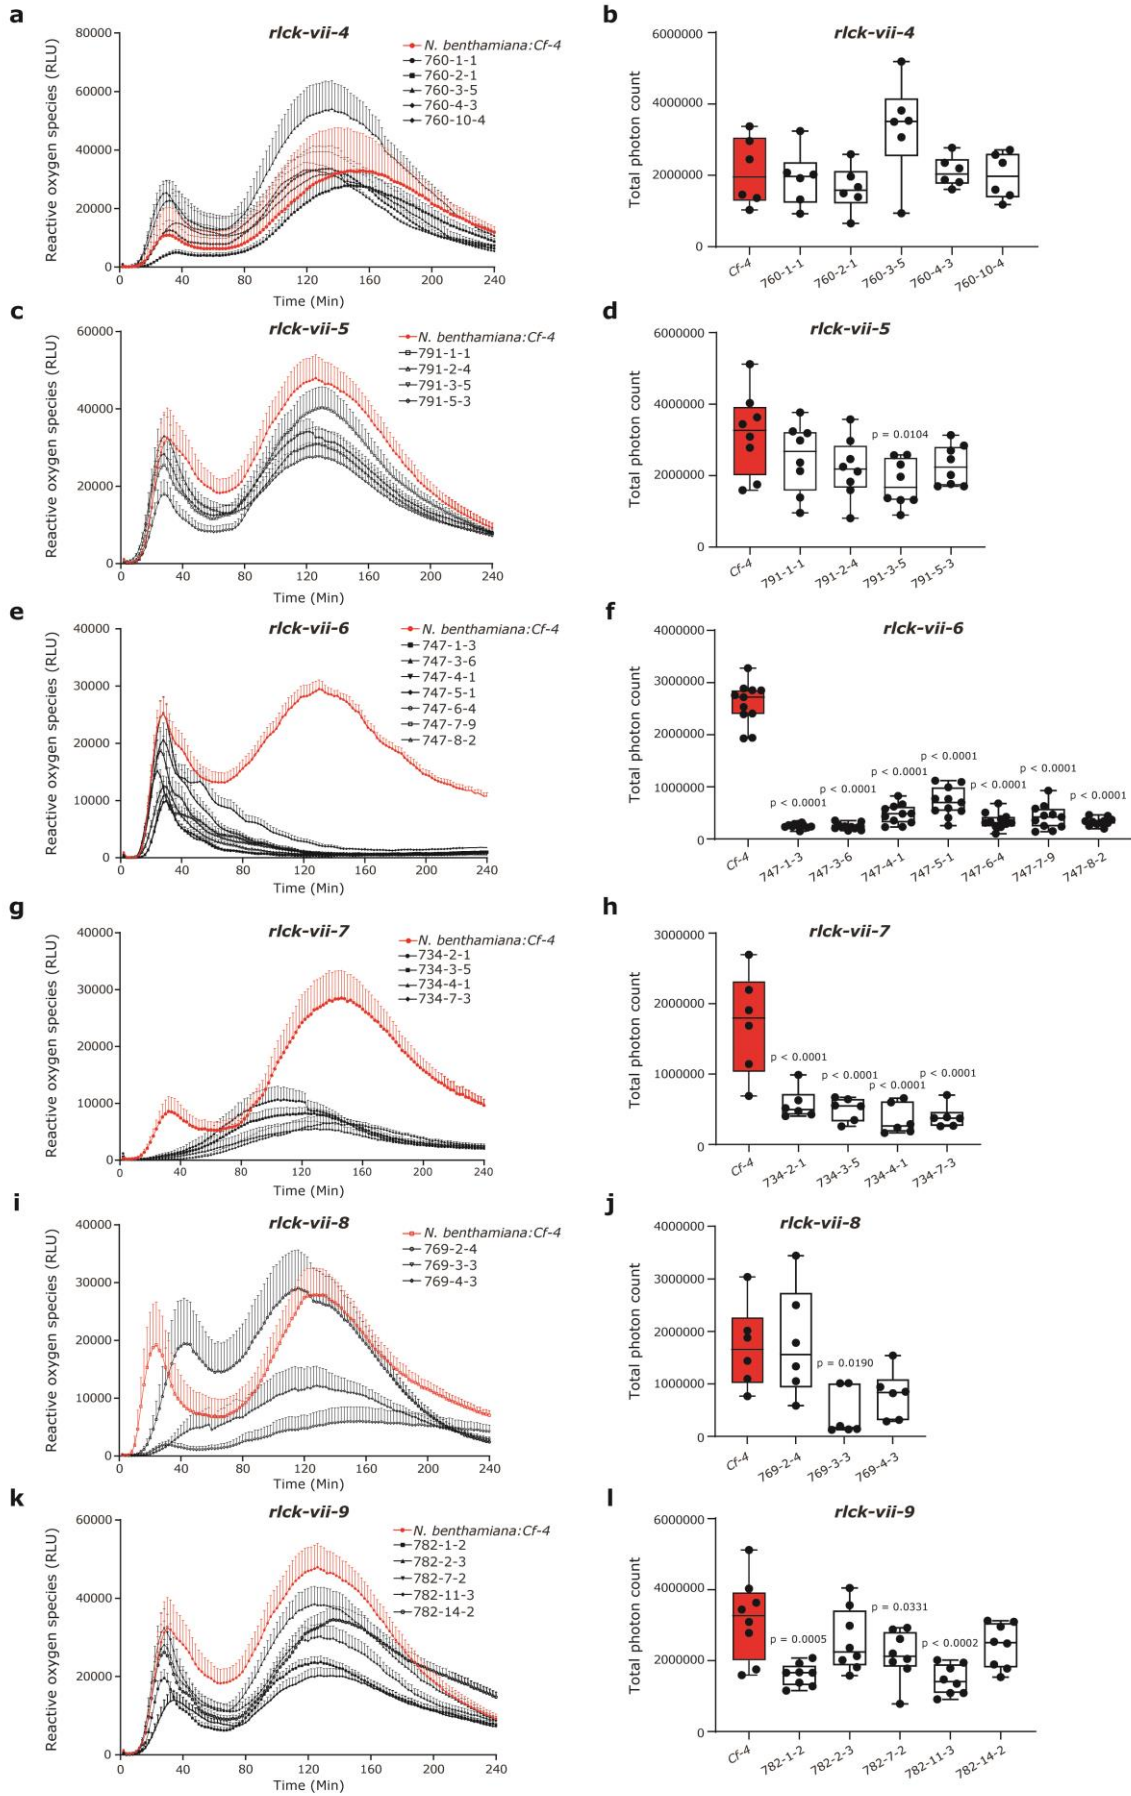

**Supplementary Figure 12. Various subfamilies from RLCK-VII play an important role in the Avr4/Cf-4/SOBIR1-triggered ROS burst in *N. benthamiana*:Cf-4.** Selected members from each RLCK-VII subfamily, being subfamilies 4, 5, 6, 7, 8 and 9, were targeted for knock-out in *N. benthamiana*:Cf-4 by multiplex CRISPR/Cas technology. Subsequently, ROS accumulation induced upon Avr4 protein treatment of leaf discs obtained from five individual *rlck-vii-4* knock-out transformants (**a** and **b**), four *rlck-vii-5* knock-out transformants (**c** and **d**), seven *rlck-vii-6* knock-out transformants (**e** and **f**), four *rlck-vii-7* knock-out transformants (**g** and **h**), three *rlck-vii-8* knock-out transformants (**i** and **j**) and five *rlck-vii-9* knock-out transformants (**k** and **l**), was determined. For this, leaf discs were treated with 0.1  $\mu$ M Avr4 protein, and the generation of ROS was monitored. Note that all *rlck* knock-out transformants were tested in the T1 generation. (**a**, **c**, **e**, **g**, **i**, and **k**) ROS production is expressed as RLU, and the data are represented as mean + SEM (n=8). (**b**, **d**, **f**, **h**, **j**, and **l**) Statistical analysis was performed with an ANOVA/Dunnett's multiple comparison test, compared with their corresponding WT. Dots indicate individual values (centre line, median; error bar, minima and maxima). The ROS profiles of the positive control (*N. benthamiana*:Cf-4), included in all assays, are indicated in red in all the line charts. Similar results were obtained in three replicates and data from one representative experiment are shown. Source data are provided as a Source Data file.

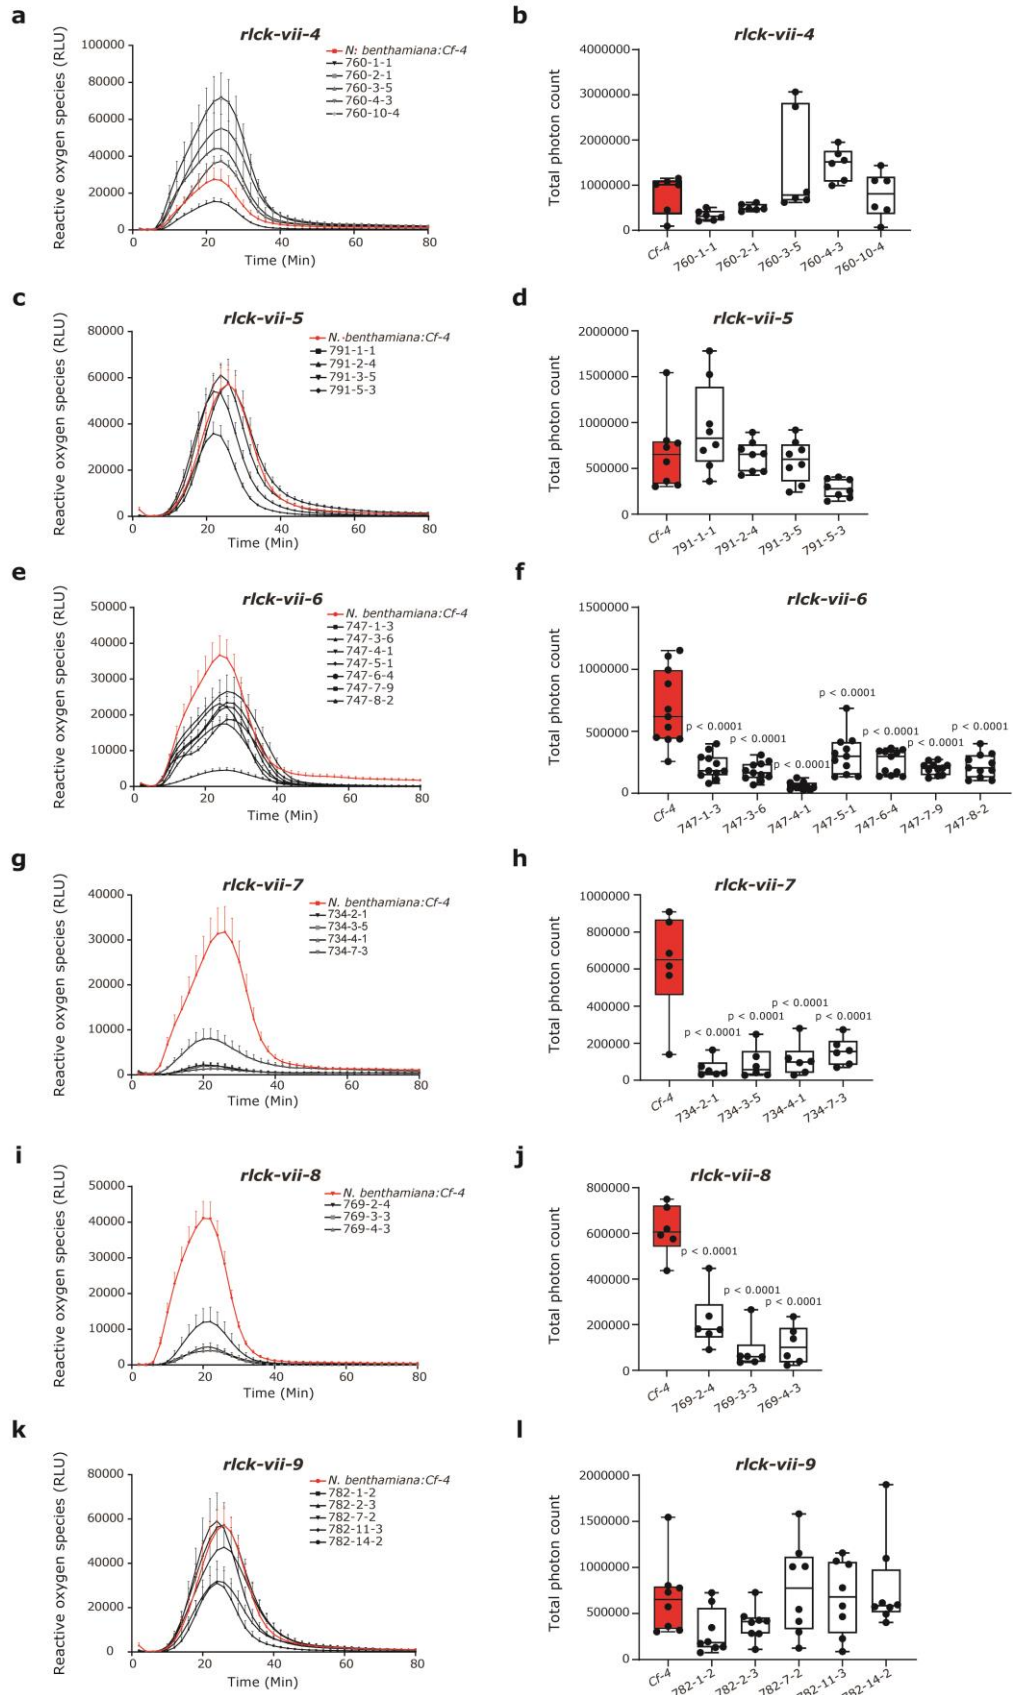

**Supplementary Figure 13. RLCK-VII-6, -7 and -8 from *N. benthamiana* also play a positive role in the flg22/FLS2-triggered ROS burst.** ROS production, triggered upon treatment with flg22, by discs taken from leaves of *rlck-vii-4* (**a** and **b**), *rlck-vii-5* (**c** and **d**), *rlck-vii-6* (**e** and **f**), *rlck-vii-7* (**g** and **h**), *rlck-vii-8* (**i** and **j**) and *rlck-vii-9* (**k** and **l**) *N. benthamiana:Cf-4* knock-out plants from the T1 generation, was measured. For this, leaf discs were taken from the different knock-out plants, as well as from *N. benthamiana:Cf-4* (the positive control), followed by treatment with a final concentration of 0.1  $\mu$ M flg22 peptide and subsequent monitoring of the accumulation of ROS. (**a**, **c**, **e**, **g**, **i**, and **k**) ROS production is expressed as RLUs, and the data are represented as mean + SEM (n=8). (**b**, **d**, **f**, **h**, **j**, and **l**) Statistical analysis was performed with an ANOVA/Dunnett's multiple comparison test, compared with their corresponding WT. Dots indicate individual values (centre line, median; error bar, minima and maxima). The ROS traces of the positive control are indicated in red in all the line charts. All experiments were repeated at least three times and data from one representative experiment are shown. Source data are provided as a Source Data file.

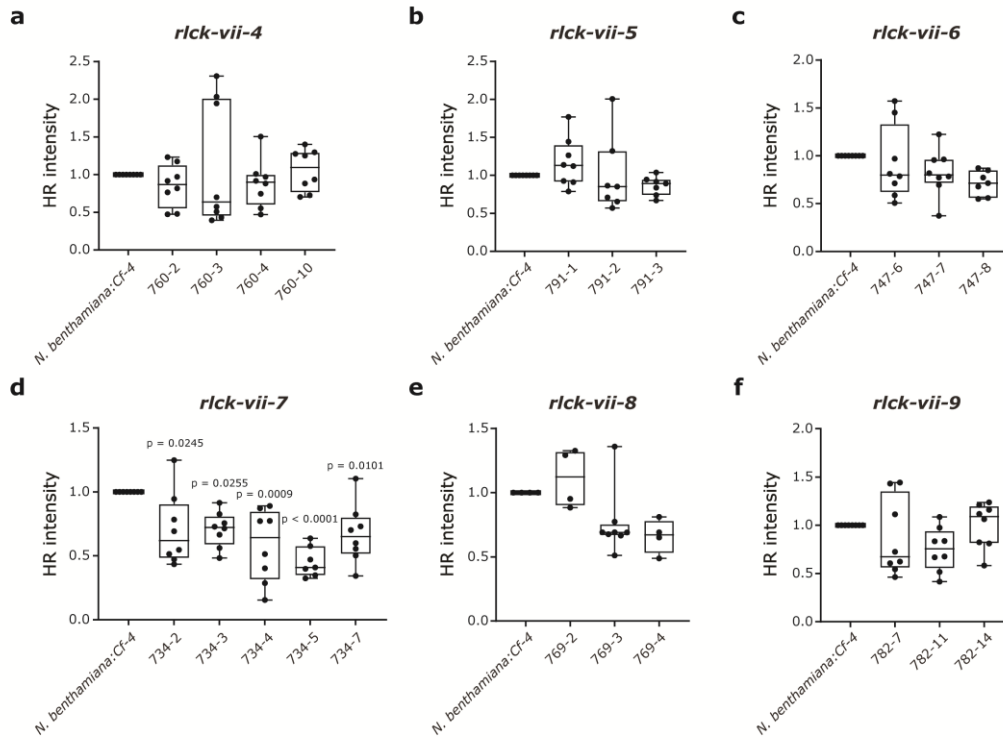

**Supplementary Figure 14. RLCK-VII-7 is required for the Avr4/Cf-4-triggered HR in *N. benthamiana: Cf-4*.** A solution of 5  $\mu$ M pure Avr4 protein was infiltrated in leaves of the *N. benthamiana: Cf-4* *rlck-vii-4* (a), *rlck-vii-5* (b), *rlck-vii-6* (c), *rlck-vii-7* (d), *rlck-vii-8* (e) and *rlck-vii-9* (f) transformants, and the Avr4/Cf-4-triggered HR was subsequently imaged using the ChemiDoc and quantified using Image Lab, at 2 dpi. All individual quantifications are shown as dots (n=8) and the means as lines. Statistical analysis was performed with an ANOVA/Dunnett's multiple comparison test, compared with *N. benthamiana: Cf-4*. Experiments were repeated at least three times with similar results, and representative results are shown. Source data are provided as a Source Data file.

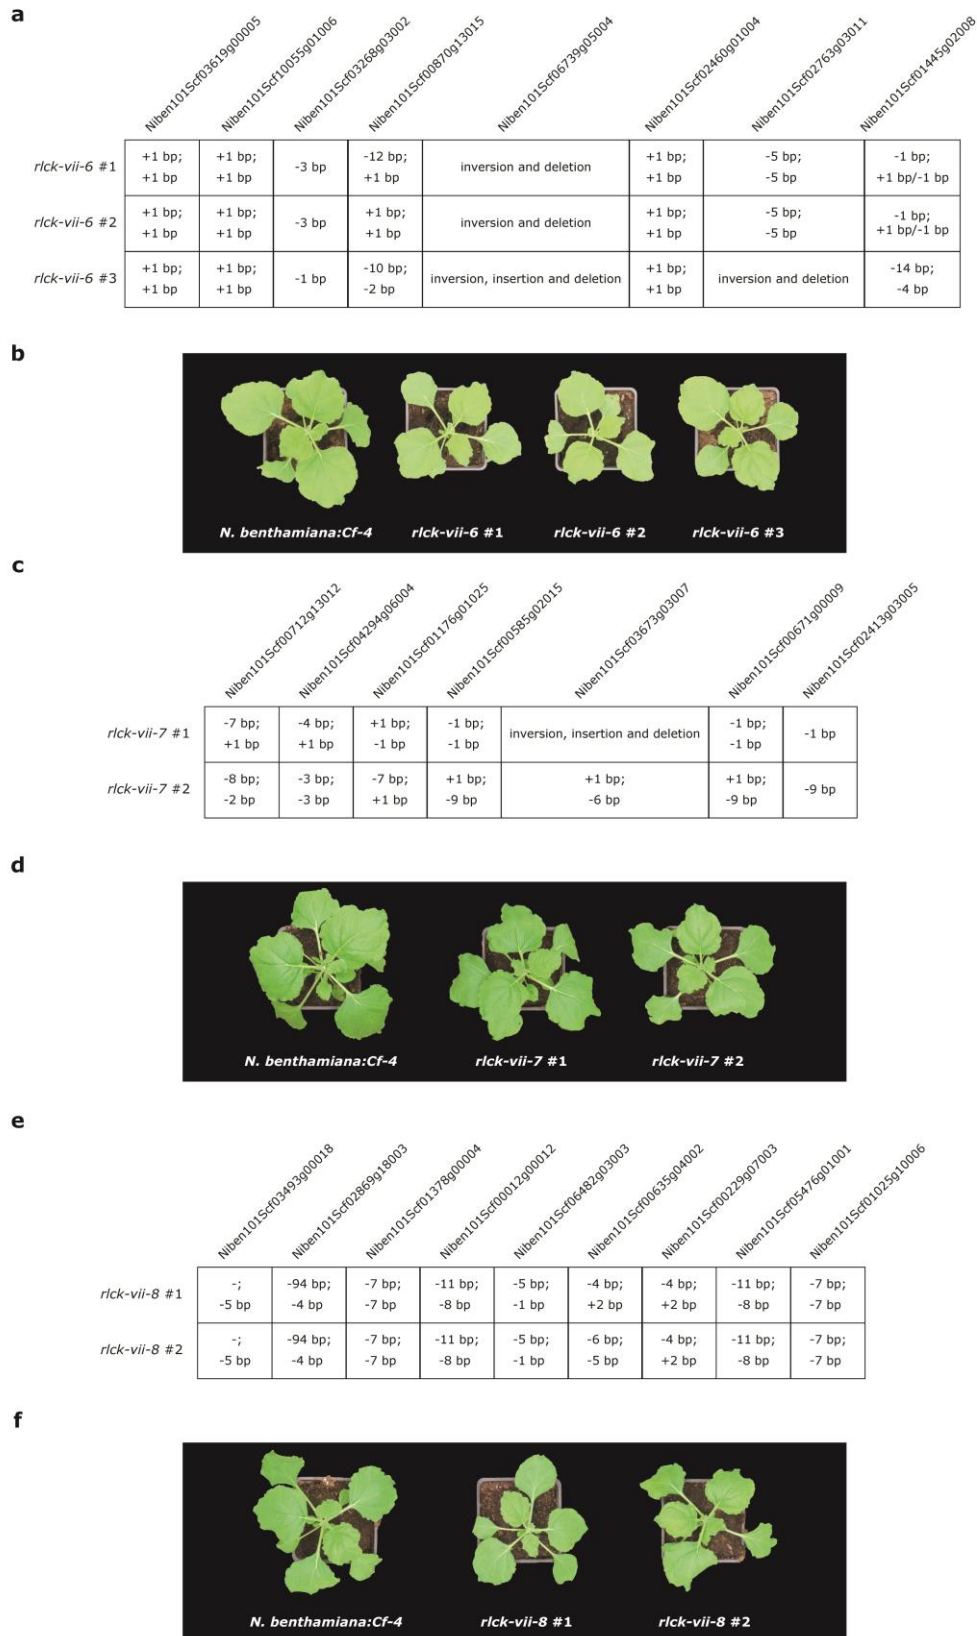

**Supplementary Figure 15. Genotypes and morphological phenotypes of the different *rlck-vii* knock-out lines.** Overview of the types of mutations present in all the *RLCK-VII-6* members (a),  
24



*RLCK-VII-7* members (**c**), and *RLCK-VII-8* members (**e**) in the independent homozygous *N. benthamiana:Cf-4* knock-out lines. Morphological phenotypes of *N. benthamiana:Cf-4* and the three independent *rlck-vii-6* (**b**), two independent *rlck-vii-7* (**d**), and two independent *rlck-vii-8* (**f**) knock-out lines. All plants were grown in soil under the same conditions and were photographed when they were four to five weeks old.

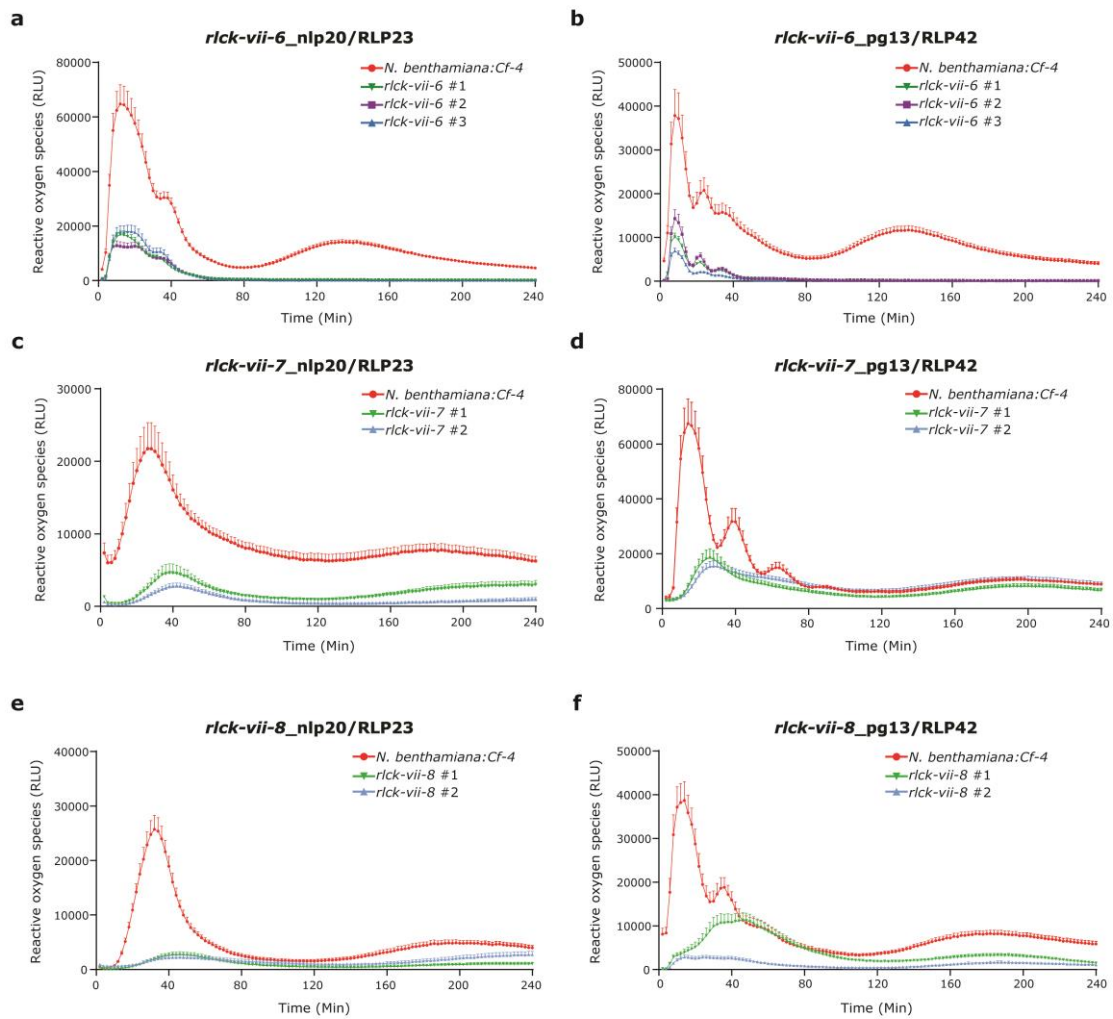

**Supplementary Figure 16. Members of RLCK-VII-6, -7, and -8 differentially contribute to ROS accumulation in *N. benthamiana* induced by nlp20/RLP23 and pg13/RLP42 combinations.** Leaf discs taken from independent *N. benthamiana: Cf-4 rlck-vii-6* (a and b), *rlck-vii-7* (c and d), and *rlck-vii-8* (e and f) lines, as well as from *N. benthamiana: Cf-4*, transiently expressing either RLP23 or RLP42, were treated with the corresponding elicitors at a 1  $\mu$ M concentration and the accumulation of ROS was monitored. ROS production is expressed as RLU, and the data are represented as mean + SEM (n=8). Source data are provided as a Source Data file.

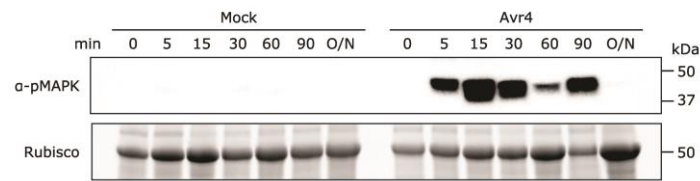

**Supplementary Figure 17. The Avr4 protein triggers a swift MAPK activation in *N. benthamiana:Cf-4*.** Water (mock) or 5  $\mu$ M of pure Avr4 protein was infiltrated in leaves of *N. benthamiana:Cf-4*. Leaf samples were taken at the indicated time points after Avr4 infiltration, and total protein extracts were subjected to immunoblotting using a p42/p44-erk antibody specifically detecting MAPKs that are activated by phosphorylation ( $\alpha$ -pMAPK). Rubisco is shown as a total protein loading control. O/N, overnight. The experiment was repeated two times with similar results and a representative result is shown.

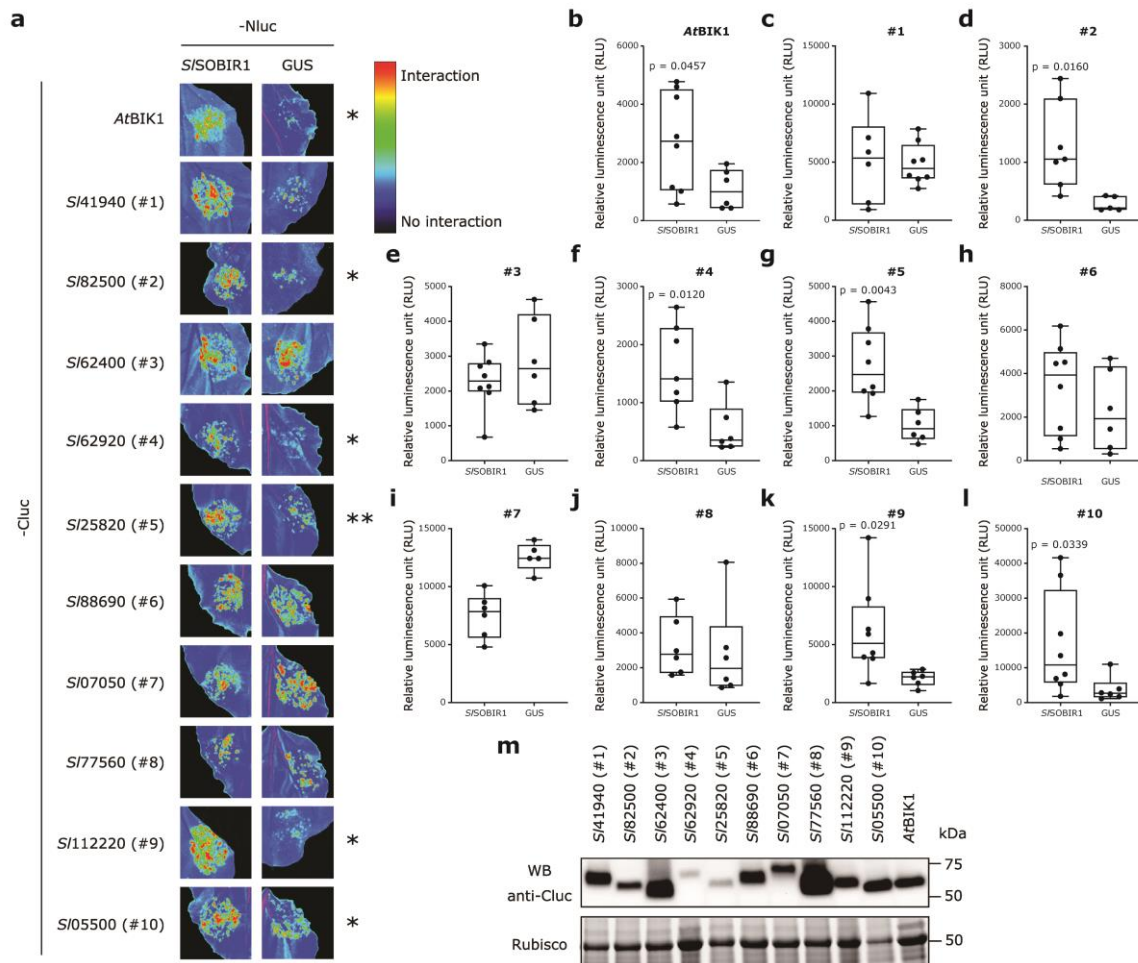

**Supplementary Figure 18. A split-luciferase assay shows the interaction between several tomato RLCKs and S/SOBIR1.** **a**, Cluc-tagged Arabidopsis BIK1 (*AtBIK1*) and tomato RLCKs and were transiently co-expressed with Nluc-tagged *S/SOBIR1*. Nluc-tagged GUS was included as a negative control. At 3 dpi leaves were sprayed with luciferin and luciferase activity was subsequently observed using a ChemiDoc device. Representative images of two independent experiments, each including six leaves for each interaction that was tested, are shown. Blue indicates that there is no luciferase signal, and a colouration increasing to red indicates a stronger luciferase signal, representing interaction to take place between the proteins. **b-l**, Quantification of the luminescence as shown in **a**. Dots indicate individual values (centre line, median; error bar, minima and maxima, n=6) Statistical significance was determined by Student's t-tests. **m**, Accumulation levels of the various tomato RLCKs, fused to the C-terminal part of the luciferase enzyme (Cluc). At 3 dpi an immunoprecipitation assay, followed by immunoblotting using anti-luciferase antibody ( $\alpha$ -Cluc) was performed. *S/41940*, Solyc07G041940-Cluc; *S/82500*, Solyc04G082500-Cluc; *S/62400*, Solyc11G062400-Cluc; *S/62920*, Solyc06G062920-Cluc; *S/25820*, Solyc05G025820-Cluc; *S/88690*, Solyc01G088690-Cluc; *S/07050*, Solyc05G007050-Cluc; *S/77560*, Solyc08G077560-Cluc; *S/112220*, Solyc01G112220-Cluc; *S/05500*, Solyc06G005500-Cluc. Source data are provided as a Source Data file.

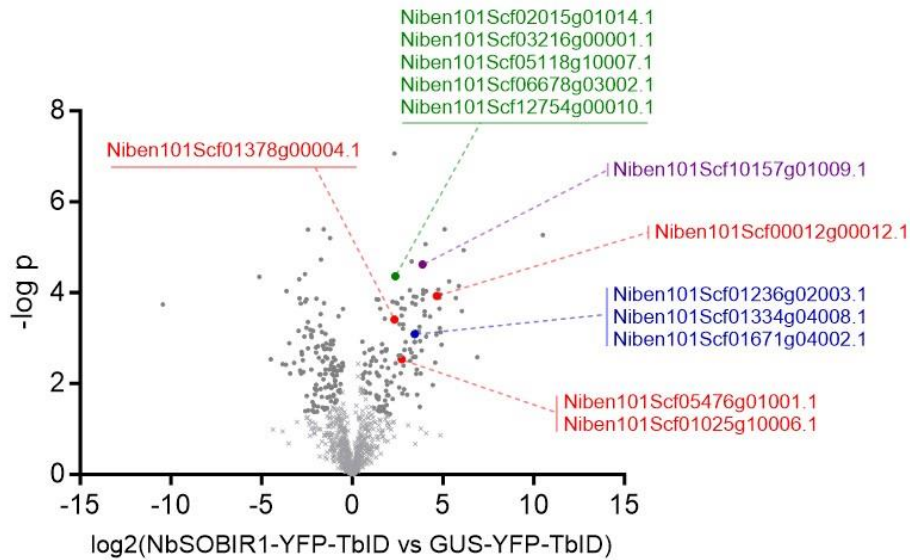

**Supplementary Figure 19. Volcano plot showing the RLCKs that were identified by proximity-dependent labelling using *NbSOBIR1-YFP-TbID* as a transiently expressed bait in *N. benthamiana*.** The change from grey crosses to closed circles marks the threshold for statistical significance. The RLCKs that were significantly enriched in three independent experiments in which *NbSOBIR1-YFP-TbID* (on the right) was used as a bait, when compared to *GUS-YFP-TbID* (on the left), are indicated with dots having different colours. Note that for RLCK-VII-6 (purple) and RLCK-VII-8 (red) we were able to identify individual RLCKs, with the exception of *Niben101Scf05476g01001* being detected together with *Niben101Scf01025g10006*, which is its closest paralog in the phylogeny shown in Figure S9. For RLCK-IV (green) and RLCK-VIII (blue) the determined peptide sequences did not allow the assignment of individual RLCK members.

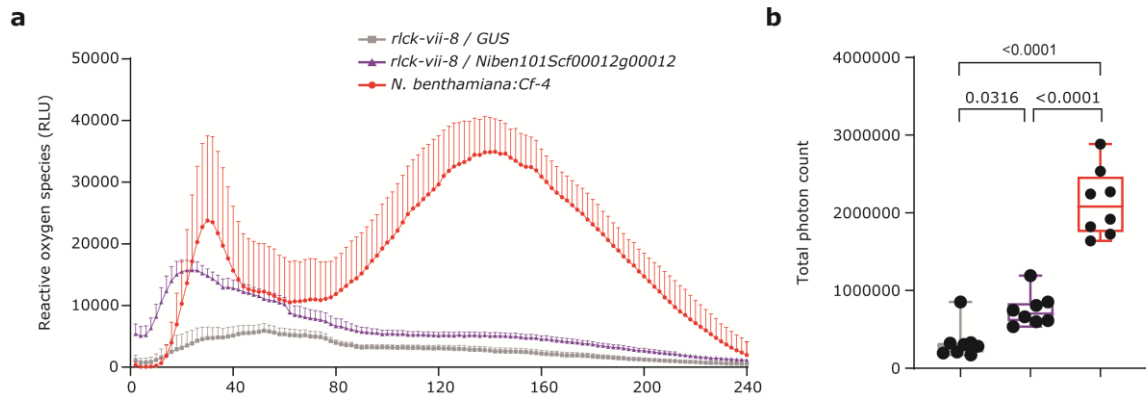

**Supplementary Figure 20. A complementation assay shows that RLCK Niben101Scf00012g00012 partially restores the ROS burst.** A complementation assay with the RLCK-VII-8 family member Niben101Scf00012g00012 (*Nb00012*) was performed by transient expression, driven by the 35S promoter, in the *rlcK-vii-8* #1 knock-out line of *N. benthamiana:Cf-4*. **a**, ROS production over time upon treatment of leaf discs transiently expressing either *GUS* or *Nb00012* with Avr4, is expressed as RLUs and the data are represented as mean + SEM (n=8). *N. benthamiana:Cf-4* was taken along as a control. Note that only partial restoration of the biphasic ROS burst takes place. **b**, Total amount of ROS generated by the leaf discs, of which the profile is shown in **a**. Dots indicate individual values (centre line, median; error bar, minima and maxima, n=8) (One-way ANOVA with Tukey's test). The total photon count represents the sum of all the relative light units (RLUs) measured over a four-hour period. Letters indicate statistical groupings. Experiments were repeated three times with similar results. Source data are provided as a Source Data file.

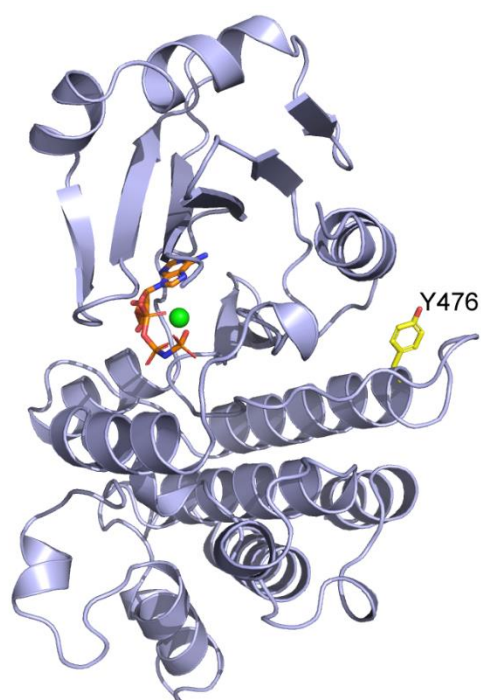

**Supplementary Figure 21. The overall structure of the inactive *AtSOBIR1* kinase domain and position of the important Tyr residues.** The ribbon diagram of the SOBIR1 kinase domain is coloured in light blue. The non-hydrolysable ATP analogue AMP-PNP and Mg<sup>2+</sup> are presented as an orange stick and a green sphere, respectively. *AtSOBIR1* Tyr476, which is analogous to *NbSOBIR1* Tyr469, is indicated as a yellow stick.

**Supplementary Table 1. *RLCK* genes selected to be targeted by single guide (sg)RNAs.**

| Subfamily                                | Gene name                                | Amount of sgRNAs                                            | Target sequence (5' - 3')                                   | Note                                                                             |
|------------------------------------------|------------------------------------------|-------------------------------------------------------------|-------------------------------------------------------------|----------------------------------------------------------------------------------|
| 4                                        | <i>Niben101Scf10970</i><br><i>g00025</i> | 2                                                           | TTACTTAAGATTGGAGA<br>AGGAGG;                                |                                                                                  |
|                                          | <i>Niben101Scf06902</i><br><i>g02019</i> |                                                             | ATGGGGAAAGAGGTATT<br>CAGCGG                                 |                                                                                  |
|                                          | <i>Niben101Scf01745</i><br><i>g04011</i> | 3                                                           | ATTAAGAAGCTCAATAC<br>ACTTGG;<br>GGAATGGCTTATTTGCA<br>CGACGG | Not present in the phylogeny, but clustered to this subfamily according to iTAK* |
|                                          | <i>Niben101Scf01489</i><br><i>g00004</i> |                                                             |                                                             |                                                                                  |
|                                          | <i>Niben101Scf01071</i><br><i>g03021</i> |                                                             |                                                             |                                                                                  |
|                                          | <i>Niben101Scf00012</i><br><i>g00010</i> | 2                                                           | GTAGTGCCAGCGTTGAT<br>ACGCGG;<br>GTGCGGAGGATGATGAA<br>AGGGGG |                                                                                  |
|                                          | <i>Niben101Scf03565</i><br><i>g07022</i> | 2                                                           | GGATCGGCTAAAGTCC<br>TGGTGG;<br>GCTCATAGGTTATTGCG<br>CACAGG  |                                                                                  |
|                                          | <i>Niben101Scf04487</i><br><i>g04008</i> |                                                             |                                                             |                                                                                  |
| <i>Niben101Scf05081</i><br><i>g01018</i> |                                          | GTTCTACGTTGGCGACA<br>AGAAGG;<br>GATACCAGCACAGAGTC<br>CAGAGG |                                                             |                                                                                  |
| 5                                        | <i>Niben101Scf06172</i><br><i>g03007</i> | 2                                                           | GCTTTGGCCCTGTTTAC<br>AAAGGG;<br>CTAATTTAACCAAATTCT<br>GATGG |                                                                                  |
|                                          | <i>Niben101Scf01326</i><br><i>g08016</i> |                                                             |                                                             | Not expressed according to QUT                                                   |
|                                          | <i>Niben101Scf06750</i><br><i>g02015</i> | 2                                                           | CCAGAATCCCTTCTTGG<br>TGAAGG;<br>ACCGCATCTAGCAGAAT<br>GTTGG  |                                                                                  |
|                                          | <i>Niben101Scf01521</i><br><i>g12006</i> |                                                             |                                                             |                                                                                  |
|                                          | <i>Niben101Scf08874</i><br><i>g01012</i> |                                                             |                                                             |                                                                                  |
|                                          | <i>Niben101Scf11795</i><br><i>g00014</i> |                                                             |                                                             |                                                                                  |
|                                          | <i>Niben101Scf14805</i><br><i>g04011</i> | 2                                                           | TGGAGTCTTGTGAATCA<br>AAGGGG;<br>GTTACTTTCCGCATTACT<br>TGTGG |                                                                                  |
|                                          | <i>Niben101Scf10820</i><br><i>g01005</i> |                                                             |                                                             |                                                                                  |
| <i>Niben101Scf05720</i><br><i>g00004</i> | 2                                        | AAGAGCTAAAAGCTGCA<br>ACGGGG;                                |                                                             |                                                                                  |



|                                          |                                          |   |                                                              |                                   |
|------------------------------------------|------------------------------------------|---|--------------------------------------------------------------|-----------------------------------|
|                                          | <i>Niben101Scf03100</i><br><i>g00002</i> |   | GTTTATGAGTTCATGAC<br>CCGTGG                                  |                                   |
|                                          | <i>Niben101Scf10157</i><br><i>g01009</i> |   |                                                              | Not selected, see Figure<br>S11   |
|                                          | <i>Niben101Scf02836</i><br><i>g03009</i> |   |                                                              | Not selected, see Figure<br>S11   |
|                                          | <i>Niben101Scf08898</i><br><i>g00003</i> |   |                                                              | Not selected, see Figure<br>S11   |
|                                          | <i>Niben101Scf03396</i><br><i>g00005</i> |   |                                                              | Not selected, see Figure<br>S11   |
|                                          | <i>Niben101Scf08926</i><br><i>g01017</i> |   |                                                              | Not selected, see Figure<br>S11   |
|                                          | <i>Niben101Scf00199</i><br><i>g05025</i> |   |                                                              | Not selected, see Figure<br>S11   |
| 6                                        | <i>Niben101Scf03619</i><br><i>g00005</i> | 2 | AATTACTTGCTTGGTGA<br>AGGTGG;                                 |                                   |
|                                          | <i>Niben101Scf10055</i><br><i>g01006</i> |   | ATTGATTGGGTACTGTT<br>GCGAGG                                  |                                   |
|                                          | <i>Niben101Scf03268</i><br><i>g03002</i> | 1 | GGGTTTGGTCTGTGCA<br>TAAGGG                                   |                                   |
|                                          | <i>Niben101Scf00870</i><br><i>g13015</i> | 2 | TTATCGTCTGAACGCGAT<br>CATCGG;<br>GATATTCAAGTTGCTTG<br>CCATGG |                                   |
|                                          | <i>Niben101Scf06739</i><br><i>g05004</i> | 2 | GTAATTTCTTGGGTGAA<br>GGAGG;                                  |                                   |
|                                          | <i>Niben101Scf02460</i><br><i>g01004</i> |   | ATTGTTGTGAAGAGGAA<br>CACAGG                                  |                                   |
|                                          | <i>Niben101Scf02763</i><br><i>g03011</i> | 2 | GGGTTTGGACCAGTTCA<br>TAAGGG;                                 |                                   |
| <i>Niben101Scf01445</i><br><i>g02008</i> | GTATATGAGTACATGCC<br>CAGAGG              |   |                                                              |                                   |
|                                          | <i>Niben101Scf14996</i><br><i>g00011</i> |   |                                                              | Not expressed<br>according to QUT |
|                                          | <i>Niben101Scf12935</i><br><i>g00042</i> |   |                                                              | Not expressed<br>according to QUT |
| 7                                        | <i>Niben101Scf00712</i><br><i>g13012</i> | 2 | GAGCTAGGAAGATTATC<br>AACAGG;<br>CCTAGTGGAGATGGAGG<br>AGGTGG  |                                   |
|                                          | <i>Niben101Scf04294</i><br><i>g06004</i> | 2 | AAGACTTTCTCATCCTAA<br>CCTGG;                                 |                                   |
|                                          | <i>Niben101Scf01176</i><br><i>g01025</i> |   | CTTGCTTCTCCGATGCA<br>TGTAGG                                  |                                   |
|                                          | <i>Niben101Scf00585</i><br><i>g02015</i> | 2 | CGCTCGCGGTAGCTGAA<br>AAACGG;<br>CTTGACACAAAACGACC<br>TAGTGG  |                                   |

|                                          |                                                              |   |                                                             |                                                                                             |
|------------------------------------------|--------------------------------------------------------------|---|-------------------------------------------------------------|---------------------------------------------------------------------------------------------|
|                                          | <i>Niben101Scf03673</i><br><i>g03007</i>                     | 2 | ATTTATGCAGAAGGGAA<br>GCTTGG;                                | Not present in the<br>phylogeny, but<br>clustered to this<br>subfamily according to<br>iTAK |
|                                          | <i>Niben101Scf00671</i><br><i>g00009</i>                     |   | AGCCGCAAGTCCCAAGA<br>AAGTGG                                 |                                                                                             |
|                                          | <i>Niben101Scf02413</i><br><i>g03005</i>                     | 1 | CTTGACACAAAACGACC<br>TAGTGG                                 |                                                                                             |
| 8                                        | <i>Niben101Scf03493</i><br><i>g00018</i>                     | 2 | ATGAACTCCGAGTAGCC<br>ACGAGG;                                |                                                                                             |
|                                          | <i>Niben101Scf02869</i><br><i>g18003</i>                     |   | GCTATAACCAAACCACT<br>TCCCGG                                 |                                                                                             |
|                                          | <i>Niben101Scf01378</i><br><i>g00004</i>                     | 2 | ATCGGGACGAAAATTCC<br>TAGTGG;                                |                                                                                             |
|                                          | <i>Niben101Scf00012</i><br><i>g00012</i>                     |   | GATAGCAATCCAAGCTC<br>GAGGG                                  |                                                                                             |
|                                          | <i>Niben101Scf06482</i><br><i>g03003</i>                     | 3 | GTCAGGACGGAAGTTTC<br>TAGTGG;                                |                                                                                             |
|                                          | <i>Niben101Scf00635</i><br><i>g04002</i>                     |   | GTAGTAGGAGAAGGAG<br>GTTTTGG                                 |                                                                                             |
|                                          | <i>Niben101Scf00229</i><br><i>g07003</i>                     |   |                                                             |                                                                                             |
|                                          | <i>Niben101Scf05476</i><br><i>g01001</i>                     | 2 | TTAAACCAAGAAGGGTG<br>GCAGGG;                                |                                                                                             |
|                                          | <i>Niben101Scf01025</i><br><i>g10006</i>                     |   | CTCCTACAACACTATCA<br>GGACGG                                 |                                                                                             |
| 9                                        | <i>Niben101Scf09004</i><br><i>g00018</i>                     | 2 | GTTTATGAGGTCATGAC<br>AAGAGG;<br>GCCCATAGTACCTATAA<br>CCCTGG |                                                                                             |
|                                          | <i>Niben101Scf11684</i><br><i>g00005</i>                     | 2 | TTAAGCCAGAAAGCTTT<br>CAGGGG;                                |                                                                                             |
|                                          | <i>Niben101Scf05916</i><br><i>g00004</i>                     |   | GTATATGACCAAAGGAA<br>GCTTGG                                 |                                                                                             |
|                                          | <i>Niben101Scf10274</i><br><i>g00001</i>                     | 2 | TTATGGCCCTGCAAACC<br>TCGAGG;                                |                                                                                             |
|                                          | <i>Niben101Scf02826</i><br><i>g01012</i>                     |   | GTATATGAATTTATGCCA<br>AGAGG                                 |                                                                                             |
|                                          | <i>Niben101Scf19533</i><br><i>g00007</i>                     | 2 | GTCAAGAAATTGAAGCC<br>GGAAGG;                                |                                                                                             |
|                                          | <i>Niben101Scf02279</i><br><i>g05002</i>                     |   | GTGTATGAGTTCATGCC<br>TAAAGG                                 |                                                                                             |
|                                          | <i>Niben101Scf11389</i><br><i>g00006</i>                     | 3 | GGTTCTGCTGGGAATCC<br>TAGAGG;                                |                                                                                             |
| <i>Niben101Scf01521</i><br><i>g13003</i> | GCAACTTCGTCAATCCAA<br>ACCTGG;<br>GTGTATGAGTTCATGCC<br>TAAAGG |   |                                                             |                                                                                             |

\*iTAK (<http://itak.feilab.net/>); QUT (<http://www.benthgenome.qut.edu.au/>). The *RLCK* genes that are not expressed according to the QUT genome browser were not chosen to be targeted by CRISPR/Cas9. Some genes that are not present in the phylogenetic tree (Figure S9B) but were found to be clustered in a specific subfamily by using iTAK, were also selected to be knocked out.

**Supplementary Table 2. Nucleotide sequences of the primers used in this study.**

| Primer code                                                                                                                       | Primer name          | Sequence (5' - 3')                     |
|-----------------------------------------------------------------------------------------------------------------------------------|----------------------|----------------------------------------|
| Primers used for introducing point mutations in the SOBIR1 kinase domain (the introduced mutations are indicated with a capital). |                      |                                        |
| ho113                                                                                                                             | NbSOBIR1_T512A fw*   | gcactcccagatgcccatGcacatgttacgacttc    |
| ho114                                                                                                                             | NbSOBIR1_T512A rev   | gaagtcgtaacatgtgCatgggcatctgggagtg     |
| ho115                                                                                                                             | NbSOBIR1_T515A fw    | gatgccatacacatgttGcgacttcaaatgttgagg   |
| ho116                                                                                                                             | NbSOBIR1_T515A rev   | cctgcaacatttgaagtcgCaacatgtgtatgggcatc |
| ho117                                                                                                                             | NbSOBIR1_T516A fw    | gccatacacatgttacgGcttcaaatgttgaggaaac  |
| ho118                                                                                                                             | NbSOBIR1_T516A rev   | gttcctgcaacatttgaagCcgtaacatgtgtatgggc |
| ho119                                                                                                                             | NbSOBIR1_S517A fw    | gccatacacatgttacgactGcaaatgttgagg      |
| ho120                                                                                                                             | NbSOBIR1_S517A rev   | cctgcaacatttGagtcgtaacatgtgtatgggc     |
| ho121                                                                                                                             | NbSOBIR1_T522A fw    | cttcaaatgttgaggGctgtgggatattatgacc     |
| ho122                                                                                                                             | NbSOBIR1_T522A rev   | ggtgcaatatacccacagCtctgcaacatttgaag    |
| ao1                                                                                                                               | SISOBIR1_T503A fw    | gcagttccagatgctcatGcacatataccacttc     |
| ao2                                                                                                                               | SISOBIR1_T503A rev   | gaagtggatgatgtgCatgagcatctggaactgc     |
| ao3                                                                                                                               | SISOBIR1_T506A fw    | gctcatacacatatacGccacttcaaatgttgagg    |
| ao4                                                                                                                               | SISOBIR1_T506A rev   | ctgcaacatttgaagtgGgatgtgtatgaggc       |
| ao5                                                                                                                               | SISOBIR1_T507A fw    | caccGcttcaaatgttgaggactgttgattattg     |
| ao6                                                                                                                               | SISOBIR1_T507A rev   | caataaatccaacagttcctgcaacatttgaagCggtg |
| ao7                                                                                                                               | SISOBIR1_S508A fw    | gctcatacacatataccactGcaaatgttgagg      |
| ao8                                                                                                                               | SISOBIR1_S508A rev   | cctgcaacatttGagtggtgatgtgtatgaggc      |
| ao9                                                                                                                               | SISOBIR1_T513A fw    | caaatgttgaggGctgttgattattg             |
| ao10                                                                                                                              | SISOBIR1_T513A rev   | gcaataaatccaacagCtctgcaacattt          |
| ho166                                                                                                                             | SISOB-like_T516A_fw  | gctgtcccagatgctcatGcacatattacaacttc    |
| ho167                                                                                                                             | SISOB-like_T516A_rev | gaagttgtaatatgtgCatgagcatctgggacagc    |
| ho168                                                                                                                             | SISOB-like_T519A_fw  | cagatgctcatacacatattGcaacttcaaatgtggc  |
| ho169                                                                                                                             | SISOB-like_T519A_rev | gccacatttgaagttgCaatgtgtatgagcatctg    |
| ho170                                                                                                                             | SISOB-like_T520A_fw  | gatgctcatacacatattacaGcttcaaatgtggcag  |
| ho171                                                                                                                             | SISOB-like_T520A_rev | ctgccacatttgaagCtgaatatgtgtatgagcatc   |
| ho172                                                                                                                             | SISOB-like_S521A_fw  | ctcatacacatattacaactGcaaatgtggcaggaaac |
| ho173                                                                                                                             | SISOB-like_S521A_rev | gttcctgccacatttGagttgtaatatgtgtatgag   |
| ho174                                                                                                                             | SISOB-like_T526A_fw  | cttcaaatgtggcaggGctataggatacatcgctc    |
| ho175                                                                                                                             | SISOB-like_T526A_rev | gagcgatgtatcctatagCtctgccacatttgaag    |
| ho123                                                                                                                             | NbSOBIR1_Y355F fw    | ggtggatgaggagaagtttTtagagctgagttaccggg |
| ho124                                                                                                                             | NbSOBIR1_Y355F rev   | cccggtaactcagctctaAaaacttctccgcatccacc |
| ho125                                                                                                                             | NbSOBIR1_Y426F fw    | ctaggccagactgccattTcttggtatatgaatatatg |
| ho126                                                                                                                             | NbSOBIR1_Y426F rev   | catatattcatataccaagAaatggcagctggcctag  |
| ho127                                                                                                                             | NbSOBIR1_Y429F fw    | gactgccattacttggtatTtgaatatatgaaaatgg  |
| ho128                                                                                                                             | NbSOBIR1_Y429F rev   | ccatTTTTcatatattcaAataccaagtaatggcagtc |
| ho129                                                                                                                             | NbSOBIR1_Y431F fw    | gccattacttggtatatgaatTtatgaaaaatgggagc |
| ho130                                                                                                                             | NbSOBIR1_Y431F rev   | gctccatttttataAattcatataccaagtaatggc   |
| ho131                                                                                                                             | NbSOBIR1_Y469F fw    | gatagcttctggacttgagtTtctccatataaaccac  |
| ho132                                                                                                                             | NbSOBIR1_Y469F rev   | gtggtttatatggagaAactcaagtcagaagctatc   |
| ho133                                                                                                                             | NbSOBIR1_Y525F fw    | gcaggaaactgtgggatTtattgaccagaataaccatc |
| ho134                                                                                                                             | NbSOBIR1_Y525F rev   | gatggattctggtgcaataAatcccacagttcctgc   |
| ho135                                                                                                                             | NbSOBIR1_Y530F fw    | gatatattgcaccagaatTccatcagacactgaag    |

|       |                      |                                               |
|-------|----------------------|-----------------------------------------------|
| ho136 | NsSOBIR1_Y530F rev   | cttcagtgtctgatggAattctgggtcaatatatc           |
| ho137 | NsSOBIR1_Y543F fw    | cgggtaagtgatataTcagctttgggtgggtg              |
| ho138 | NsSOBIR1_Y543F rev   | caccacaccaaagctgAatatcacacttaccgc             |
| ao11  | SISOBIR1_Y346F fw    | gtggctgtggagaagttTtagagcagagctac              |
| ao12  | SISOBIR1_Y346F rev   | gtagctctgtctcAaaacttctccacagccac              |
| ao13  | SISOBIR1_Y417F fw    | gccagactgtcattTcttggctacgaatacatg             |
| ao14  | SISOBIR1_Y417F rev   | catgtattcgtagaccaagAaatgacagtctggc            |
| ao15  | SISOBIR1_Y420F fw    | cttggctTcgaatacatgaaaaatgggagtttacag          |
| ao16  | SISOBIR1_Y420F rev   | ctgtaaactcccattttcatgtattcgAagaccaag          |
| ao17  | SISOBIR1_Y422F fw    | cgaatTcatgaaaaatgggagtttacaggatattc           |
| ao18  | SISOBIR1_Y422F rev   | ggatatcctgtaaactcccattttcatgAattcg            |
| ao19  | SISOBIR1_Y460F fw    | gctgtgtgtctcaggtTtctccatataaaccatac           |
| ao20  | SISOBIR1_Y460F rev   | gtaggtttatattggagaAactcgagaccagcagc           |
| ao21  | SISOBIR1_Y521F fw    | gcaccagaatTttatcagacactgaagtttacag            |
| ao22  | SISOBIR1_Y521F rev   | ctgtaaacttcaggtctgataaAattctgggtgc            |
| ao23  | SISOBIR1_Y522F fw    | gcaccagaatattTcagacactgaagtttac               |
| ao24  | SISOBIR1_Y522F rev   | gtaaacttcaggtctgaAaatattctgggtgc              |
| ao25  | SISOBIR1_Y534F fw    | gataagtgatataTcagctttgggtgggtgc               |
| ao26  | SISOBIR1_Y534F rev   | gcaccacaccaaagctgAatatcacacttatc              |
| ao27  | SISOBIR1_Y588F fw    | gcttataggaaatggatTcgacgaacaaatgc              |
| ao28  | SISOBIR1_Y588F rev   | gcattgttcgtcgAatccatttcctataagc               |
| ho142 | SISOB-like_Y359F_fw  | cattgggcaaggtggatgtggaagttTtaaagctgc          |
| ho143 | SISOB-like_Y359F_rev | ctttccgtcactccaggaatgcagcttaAaaactttcc        |
| ho144 | SISOB-like_Y430F_fw  | gccaagaccagactgccactTcttggctatgagtacatg       |
| ho145 | SISOB-like_Y430F_rev | catgtactcatagaccaagAagtggcagctctgtcttggc      |
| ho146 | SISOB-like_Y433F_fw  | ctgccactacttggctTtgagtacatgaaaaatgggagc       |
| ho147 | SISOB-like_Y433F_rev | gtccccattttcatgtactcaAagaccaagtagtggcag       |
| ho148 | SISOB-like_Y435F_fw  | gccactacttggctatgagtTcatgaaaaatgggagc         |
| ho149 | SISOB-like_Y435F_rev | gtccccattttcatgAactcatagaccaagtagtggc         |
| ho150 | SISOB-like_Y473F_fw  | gctgtgtgactcaggtTtctccatataaatcatactcagcg     |
| ho151 | SISOB-like_Y473F_rev | cgctgagtatgatttatattggagaAactcgagtccagcagc    |
| ho152 | SISOB-like_Y529F_fw  | ggcaggaactataggatTcatcgctccagaatatcatcag      |
| ho153 | SISOB-like_Y529F_rev | ctgatgatattctggagcagatgAatcctatagtctctgcc     |
| ho154 | SISOB-like_Y534F_fw  | ggatacatcgctccagaatTcatcagacactgaagttcactg    |
| ho155 | SISOB-like_Y534F_rev | cagtgaacttcaggtctgatgaAattctggagcagatgatcc    |
| ho156 | SISOB-like_Y547F_fw  | ctgataagtgatataTcagctttgggggtgctg             |
| ho157 | SISOB-like_Y547F_rev | cagcaccaccaaagctgAatatcacacttatcag            |
| ho447 | 1004/5004_K110A_f2   | ggctcagcctgtggctgtaGCgcttttgatttag            |
| ho448 | 1004/5004_K110A_r2   | ctaaatccaaaagcGCtacagccacaggctgagcc           |
| ho451 | 13012_K127A-f2       | gctgttGCaaaatcaaatcctgatagtaacaaggtctcaagg    |
| ho452 | 13012_K127A-r2       | gatttgattttGCaacagcaactggaattccaactccaactttag |
| ho449 | 1025_K119A-f2        | gtaattgtgttGCgaaattgaattccgaaagcttacaggggttg  |
| ho450 | 1025_K119A-r2        | caatttcCGaacagcaattacagtgccgctgccactcc        |
| ho453 | 00012_K109A-f2       | gtgtgatcattgctgtgGCacggctgaatcaagaag          |
| ho454 | 00012_K109A-r2       | cttcttgattcagccgtGCcacagcaatgatcacac          |
| ho472 | 6482_K114A-f2        | gctgtgGCgaaattaaatcaagaaggtttgcaggggac        |
| ho473 | 6482_K114A-r2        | gatttaacttcGCcacagctatcacgattccagctccagg      |

---

Primers for genotyping the *rlck-vii-6* knock-out plants.

|       |                     |                       |
|-------|---------------------|-----------------------|
| ho228 | 747_gen0_1-F_JS2419 | ccaaaaccaaaggcaaaggag |
|-------|---------------------|-----------------------|

|       |                          |                        |
|-------|--------------------------|------------------------|
| ho229 | 747_geno_1-R1004_JS2420  | gattagccaggtagatagtgg  |
| ho230 | 747_geno_1-R5004_JS2421  | gactgaagttccaaaagcc    |
| ho231 | 747_geno_2-F_JS2422      | gtgatgaagattgcatggg    |
| ho232 | 747_geno_2-R2008_JS2423  | gtttacgagttattgcacgat  |
| ho233 | 747_geno_2-R3011_JS2424  | caccaactcccaaaaagcc    |
| ho234 | 747_geno_3-F3002_JS2425  | gtggtcattcaaggctagc    |
| ho235 | 747_geno_3-R3002_JS2426  | ttttctaaactccgtgccg    |
| ho236 | 747_geno_4-F13015_JS2427 | tcatcatcatagtaggctagcc |
| ho237 | 747_geno_4-R13015_JS2428 | tagtcctttgcagcaccta    |
| ho238 | 747_geno_5-F_JS2429      | cgtaggtgtcattctcgga    |
| ho239 | 747_geno_5-R1006_JS2430  | tgtaacttctggggtacgt    |
| ho240 | 747_geno_5-R0005_JS2431  | tgcgtagcatcaaaaacacc   |
| ho241 | 747_R1-13015_JS2486      | tgttttctttacacacccc    |
| ho242 | 747_F2-13015_JS2487      | tgaatacatggcaaggggaa   |

---

Primers for genotyping the *rlck-vii-7* knock-out plants.

---

|       |                          |                      |
|-------|--------------------------|----------------------|
| LHo07 | 734_00009F_JS2556        | ccagttcttctggctacg   |
| LHo08 | 734_03007F_JS2555        | cctgttcttctgatctatg  |
| LHo09 | 734_03007R+00009R_JS2557 | caactaagcagaccttacc  |
| LHo10 | 734_01025F_JS2558        | tccattgttcagacacagtg |
| LHo11 | 734_06004F_JS2559        | cattgctcagagatagtgg  |
| LHo12 | 734_06004R+01025R_JS2560 | gatgctcagaaagaagg    |
| LHo13 | 734_02015F_JS2551        | acaaaaggacccaaattgct |
| LHo14 | 734_02015R_JS2552        | tggagtaagcgtcttctcat |
| LHo15 | 734_03005F_JS2553        | ctacgtacgcctttacaga  |
| LHo16 | 734_03005R_JS2554        | cggtgattgctgtatcgat  |
| LHo17 | 734_13012F_JS2561        | tagcaacagcacaactgtt  |
| LHo18 | 734_13012R_JS2562        | tccttgagacctgttctact |

---

Primers for genotyping the *rlck-vii-8* knock-out plants.

---

|      |                  |                                    |
|------|------------------|------------------------------------|
| Po05 | Scf00012         | aaattagaacacggacaat                |
| Po01 | Scf00229_fw      | gctgcaaagatagtagcaattgg            |
| Po02 | Scf00229_rv      | gaagcacgcagatagggcg                |
| Po03 | Scf00635_fw      | gcaattggctttgtatgtgc               |
| Po04 | Scf00635_rv      | gcgacctataatagtccaaattgc           |
| Po36 | Scf1025_fw       | gactagtaattcgaacagc                |
| Po37 | Scf1025_rv       | tcctaactctgtatatgggg               |
| Po09 | Scf01378         | aaattagacacgggcaac                 |
| Po08 | Scf02819         | tttcggttgaaccggtga                 |
| Po10 | Scf03493         | tttcggttgaactcatagc                |
| Po11 | Scf05476_fw      | gtaattggtttcttggatgtatc            |
| Po14 | Scf05476_rv      | gcgaatcaagtcgcctattcatca           |
| Po15 | Scf6482_fw       | ggtgtcatgagaagtcagattgc            |
| Po16 | Scf6482_rv       | ccaattttactacgaagtaccatgcg         |
| Po06 | Scf06482_fw      | gcaaagatagtagtaattggctttgtatgtgc   |
| Po07 | Scf06482_rv      | gcaaatgaatgtaatttgaactagtattacgtgc |
| Po12 | Scf0012-1378_fw  | atgttgctatctctggttt                |
| Po13 | Scf02869-3493_rv | gcctgtgttcatcttctaag               |

---

Primers used for generating *E. coli* expression constructs of the SOBIR1 kinase domain (sequences that are identical to the expression vectors are underlined).

---

|       |                           |                                                    |
|-------|---------------------------|----------------------------------------------------|
| ho201 | pET-GST_fw                | aagcttgcgccgcactcgag                               |
| ho202 | pET-GST_rev               | caggggcccctggaacagaacttc                           |
| ho203 | NbSOBIR1_KD+90bp_fw       | gttctgttccaggggcccctgcgaaagggaaagactgatggaac       |
| ho204 | NbSOBIR1_KD+90bp_rev      | ctcgagtgcgccgcaagcttctaatagcttgatctgagttaacatac    |
| ho215 | SISOBIR1_KD+90bp_fw       | gttctgttccaggggcccctgagaagaggggaataacgattcaag      |
| ho216 | SISOBIR1_KD+90bp_rev      | ctcgagtgcgccgcaagcttctaatagcttgatctgagttaacatgc    |
| ho217 | SISOBIR1-like_KD+90bp_fw  | gttctgttccaggggcccctgagagggatcagaaatgatccagg       |
| ho218 | SISOBIR1-like_KD+90bp_rev | ctcgagtgcgccgcaagcttttaatagcttgatctgcatcaacatgc    |
| ho219 | pET-15b_fw                | cggatcctcgagcatatggctg                             |
| ho220 | pET-15b_rev               | gctgctaacaagcccgaaggaag                            |
| ho221 | NbSO_KD+90bp_fw           | gccatatactcgaggatccgcgaaagggaaagactgatggaac        |
| ho222 | NbSO_KD+90bp_rev          | ctttcgggctttgttagcagcctaatagcttgatctgagttaacatac   |
| ho223 | SISO_KD+90bp_fw           | gccatatactcgaggatccgagaagaggggaataacgattcaag       |
| ho224 | SISO_KD+90bp_rev          | ctttcgggctttgttagcagcctaatagcttgatctgagttaacatgc   |
| ho225 | SISO-like_KD+90bp_fw      | gccatatactcgaggatccgagagggatcagaaatgatccagg        |
| ho226 | SISO-like_KD+90bp_rev     | ctttcgggctttgttagcagcctaatagcttgatctgcatcaacatgc   |
| ho282 | NbSERK3b_kd_fw            | gccatatactcgaggatccgggacaactcaagaggtttccttg        |
| ho283 | NbSERK3b_kd_rev           | ctttcgggctttgttagcagcctcatcttgccccgacaattcatc      |
| ho286 | SISERK3a_kd_fw            | gccatatactcgaggatccgggacaactcaaaaggtttccttg        |
| ho287 | SISERK3a_kd_rev           | ctttcgggctttgttagcagcctcatcttgccctgacaactcatc      |
| ho326 | 1004-5004GST_fw           | gttctgttccaggggcccctgatgaagattacatgggaatctctagttcc |
| ho327 | 1004GST_rv                | ctcgagtgcgccgcaagcttagctctatggaaatcattgtgcaatg     |
| ho333 | 5004GST_rv                | ctcgagtgcgccgcaagcttagctctatggaaattattgcgcaatg     |
| ho439 | 13012_GST-fw              | gttctgttccaggggcccctgatgggaaattgtggtcctaatac       |
| ho440 | 13012_GST-rev             | ctcgagtgcgccgcaagcttgtagcttcgattgatggcagcatg       |
| ho437 | 1025_GST-fw               | gttctgttccaggggcccctgatgggaaattgttccagtaatgcgctc   |
| ho438 | 1025_GST-rev              | ctcgagtgcgccgcaagcttgtagctctcttgggagtgatag         |
| ho441 | 00012_GST-fw              | gttctgttccaggggcccctgatgggattgttggagtgctag         |
| ho442 | 00012_GST-rev             | ctcgagtgcgccgcaagcttttagcataaaagggagaagc           |
| ho464 | 6482_GST_fw               | gttctgttccaggggcccctgatgggattgtctgagcaacc          |
| ho465 | 6482_GST_rev              | ctcgagtgcgccgcaagcttctgcccgggagtgctcttc            |

Primers used for generating the split-luciferase binary constructs.

|       |                           |                                    |
|-------|---------------------------|------------------------------------|
| JRO03 | KpnI-Solyc07g041940.2-fw  | cggggtaccatgaagattggatgggaatc      |
| JRO04 | SalI-Solyc07g041940.2-rev | acgcgtcgacgagctcttgaaccattttg      |
| JRO05 | KpnI-Solyc04g082500.2-fw  | cggggtaccatgggaaattgttgcc          |
| JRO06 | SalI-Solyc04g082500.2-rev | acgcgtcgacatagctacggtttttggagc     |
| JRO07 | KpnI-Solyc11g062400.1-fw  | cggggtaccatgggattgtgctttg          |
| JRO08 | SalI-Solyc11g062400.1-rev | acgcgtcgactcttgaatgtgtcacatatctctt |
| JRO09 | KpnI-Solyc06g062920.2-fw  | cggggtaccatggctacttgccgaattg       |
| JRO10 | SalI-Solyc06g062920.2-rev | acgcgtcgacataagaatttagttgtttctttc  |
| JRO11 | KpnI-Solyc05g025820.2-fw  | cggggtaccatgaagattacatgggaatctctag |
| JRO12 | SalI-Solyc05g025820.2-rev | acgcgtcgacagctctatggaaatcattgtgc   |
| JRO13 | KpnI-Solyc01g088690.2-fw  | cggggtaccatgaagtgttttttacttcaag    |
| JRO14 | XhoI-Solyc01g088690.2-rev | ccgctcgagtgtagttttacccttctgcatg    |
| JRO15 | KpnI-Solyc05g007050.2-fw  | cggggtaccatgggattaggtggatg         |
| JRO16 | SalI-Solyc05g007050.2-rev | acgcgtcgacagttttccggtttggtt        |
| JRO17 | KpnI-Solyc08g077560.2-fw  | cggggtaccatgctgaagtgttttatatattca  |
| JRO27 | SalI-Solyc08g077560.2-rev | acgcgtcgacagcctgagctaagg           |
| JRO21 | KpnI-Solyc01g112220.2-fw  | cggggtaccatgggagttgtttcagttctaa    |

|                                                                                                                                                              |                             |                                              |
|--------------------------------------------------------------------------------------------------------------------------------------------------------------|-----------------------------|----------------------------------------------|
| JRO22                                                                                                                                                        | SalI-Solyc01g112220.2-rev   | acgcgtcgactgatgctcttttgggagtg                |
| JRO23                                                                                                                                                        | KpnI-Solyc06g005500.2-fw    | cgggggtaccatggggatatgtttgagtg                |
| JRO24                                                                                                                                                        | SalI-Solyc06g005500.2-rev   | acgcgtcgactttagcgtaaaggggagaag               |
| Lo94                                                                                                                                                         | SISOBIR1-Kpn1-fw            | cggcgcggtaccatgacttcgaatatccactttttctttatacg |
| Lo95                                                                                                                                                         | SISOBIR1-Sal1-NoStop-rev    | gccgccgtcgacatgcttgatctgagttaacatgc          |
| Lo153                                                                                                                                                        | GUS-Kpn1-fw                 | cggcgggggtaccatgttacgtcctgtagaaacc           |
| Lo154                                                                                                                                                        | GUS-Sal1-rev                | gaagccgtcgacttgttgcctcctgctgcgggttttc        |
| Primers used for generating the TbID binary constructs.                                                                                                      |                             |                                              |
| JO4                                                                                                                                                          | NsOBIR1-fw                  | ttctgaaggcatgtgcc                            |
| JO6                                                                                                                                                          | YFP-rev                     | ctcaggtagtggtgtcgg                           |
| JO8                                                                                                                                                          | TurboID-rev                 | gcagatacaggctattggg                          |
| JO9                                                                                                                                                          | GUS-fw                      | ggttatctctatgaactgtgcg                       |
| Primers used for generating the complementation construct of Niben101Scf00012g00012.1.<br>Nucleotides in lower case letters align with the Gateway sequence. |                             |                                              |
| Po17                                                                                                                                                         | Niben101Scf00012g00012.1 fw | caccATGGGGATTTGTTTGAGTGCTAG                  |
| Po18                                                                                                                                                         | Niben101Scf00012g00012.1 fw | TTTAGCATAAAAGGAGAAGC                         |

\* fw, forward; rev, reverse.
